1 Characterization of cephalic and non-cephalic sensory cell types  
2 provides insight into joint photo- and mechanoreceptor  
3 evolution

4

5 Roger Revilla-i-Domingo<sup>1,2,3</sup>, Vinoth Babu Veedin Rajan<sup>1,2</sup>, Monika  
6 Waldherr<sup>1,2</sup>, Günther Prohaczka<sup>1,2</sup>, Hugo Musset<sup>1,2</sup>, Lukas Orel<sup>1,2</sup>, Elliot  
7 Gerrard<sup>4</sup>, Moritz Smolka<sup>1,2,5</sup>, Matthias Farlik<sup>6,7</sup>, Robert J. Lucas<sup>4</sup>, Florian  
8 Raible<sup>1,2,3,@</sup> and Kristin Tessmar-Raible<sup>1,2,@</sup>

9

10 <sup>1</sup> Max Perutz Labs, University of Vienna, Vienna BioCenter, Dr. Bohr-Gasse 9/4, 1030 Vienna

11 <sup>2</sup> Research Platform “Rhythms of Life”, University of Vienna, Vienna BioCenter, Dr. Bohr-  
12 Gasse 9/4, A-1030 Vienna

13 <sup>3</sup> Research Platform “Single-Cell Regulation of Stem Cells”, University of Vienna,  
14 Althanstraße 14, A-1090 Vienna

15 <sup>4</sup> Division of Neuroscience & Experimental Psychology, University of Manchester, UK

16 <sup>5</sup> Center for Integrative Bioinformatics Vienna, Max Perutz Labs, University of Vienna and  
17 Medical University of Vienna, Dr. Bohr-Gasse 9, Vienna, Austria

18 <sup>6</sup> CeMM Research Center for Molecular Medicine of the Austrian Academy of Sciences, 1090,  
19 Vienna, Austria

20 <sup>7</sup> Department of Dermatology, Medical University of Vienna, Währinger Gürtel 18-20, 1090  
21 Vienna

22

23

24 @ Corresponding authors:

25 [florian.raible@mfpl.ac.at](mailto:florian.raible@mfpl.ac.at),

26 [kristin.tessmar@mfpl.ac.at](mailto:kristin.tessmar@mfpl.ac.at)

27

28 ABSTRACT

29 Rhabdomeric Opsins (r-Opsins) are light-sensors in cephalic eye  
30 photoreceptors, but also function in additional sensory organs. This has  
31 prompted questions on the evolutionary relationship of these cell types, and if  
32 ancient r-Opsins cells were non-photosensory. Our profiling of cephalic and  
33 non-cephalic r-opsin1-expressing cells of the marine bristleworm *Platynereis*  
34 *dumerilii* reveals shared and distinct features. Non-cephalic cells possess a  
35 full set of phototransduction components, but also a mechanosensory  
36 signature. We determine that Pdu-r-Opsin1 is a Gαq-coupled blue-light  
37 receptor. Profiling of cells from *r-opsin1* mutants versus wild-types, and a  
38 comparison under different light conditions reveals that in the non-cephalic  
39 cells, light – mediated by r-Opsin1 – adjusts the expression level of a calcium  
40 transporter relevant for auditory mechanosensation in vertebrates. We  
41 establish a deep learning-based quantitative behavioral analysis for animal  
42 trunk movements, and identify a light-and r-Opsin-1-dependent fine-tuning of  
43 the worm's undulatory movements in headless trunks, which are known to  
44 require mechanosensory feedback.  
45 Our results suggest an evolutionary concept in which r-Opsins act as ancient,  
46 light-dependent modulators of mechanosensation, and suggest that light-  
47 independent mechanosensory roles of r-Opsins likely evolved secondarily.

## 48 INTRODUCTION

49 Opsins, a subgroup of G protein-coupled transmembrane receptors (GPCRs),  
50 serve as the main light sensors in animal photoreceptor cells. Rhabdomeric  
51 Opsins (r-Opsins) are an ancient class of Opsins particularly widespread  
52 among invertebrates, typically expressed in larval photoreceptor cells and  
53 cephalic eyes that rely on rhabdomeric photoreceptors [1-3]. The role of r-  
54 Opsins in light perception has been best studied in the model of the  
55 *Drosophila* eye photoreceptor (EP) cells. Stimulation of a light-sensitive  
56 chromophore (retinaldehyde) covalently bound to the G $\alpha_q$ -coupled r-Opsin  
57 apoprotein initiates an intracellular cascade, consisting of a total of 12  
58 proteins, that leads to an increase in intracellular calcium (reviewed in ref. [4]).  
59 Whereas most of our knowledge about the function of r-Opsins in animal  
60 photoreception stems from studies on cephalic EPs, non-cephalic *r-opsin*-  
61 expressing cells are found in representatives of various animal groups. For  
62 instance, *r-opsin* homologs demarcate putative photoreceptor cells at the tube  
63 feet of sea urchins [5,6], and in Joseph cells and photoreceptors of the dorsal  
64 ocelli of the basal chordate amphioxus [7]. In the case of the brittle star, such  
65 non-cephalic photoreceptor cells have been implicated in a form of vision [8].  
66 Yet the diverse locations of *r-opsin*-positive cells, and the fact that they are  
67 not strictly associated with pigment cells, have raised the question whether *r*-  
68 *opsin*-positive cells outside the eye might have different functional roles.  
69 This implies the evolutionary question to which extent non-cephalic *r-opsin*-  
70 positive cells share an evolutionary history with cephalic eye photoreceptors,  
71 or represent independent evolutionary inventions. A biological context in  
72 which this question is particularly interesting to address are animals that  
73 exhibit segmented body axes, featuring sensory organs in some or all of these  
74 segments. Analyses of the early Cambrian Lobopodian fossil *Microdictyon*  
75 *sinicum* suggested that this putative ancestor of arthropods possessed  
76 compound eye structures above each pair of legs [9,10]. This is in line with  
77 the idea that segmental photoreceptive organs could have been an ancestral  
78 feature, which might have been secondarily modified to allow for a more  
79 efficient division of labor between head and trunk. A similar hypothesis could  
80 be drawn for ancestors of annelids, a segmented clade of lophotrochozoans:

81 Various recent annelid groups, including opheliids, sabelliids and syllids,  
82 feature segmental eye spots with rhabdomeric photoreceptors (reviewed in  
83 ref. [11]). This would be consistent with the ancient presence of r-opsins and  
84 photoreceptive organs in a homonomously segmented annelid ancestor.  
85 Given the possible ancestry of segmentation in bilaterians [12-14], the  
86 outlined scenarios of segmental photoreceptive organs might even date back  
87 to the dawn of bilaterian animal evolution.

88 However, *r-opsin* genes have also started to be implied in functions that are  
89 unrelated to photoreception. Most notably, *r-opsin* genes are expressed in  
90 certain classes of mechanosensory cell types, such as the Johnston organ  
91 (JO) neurons and the larval Chordotonal organ (ChO) of *Drosophila* [15,16],  
92 or the neuromasts of the lateral line of zebrafish and frog [17,18]. Experiments  
93 assessing functionality of mechanosensation in both JO and ChO neurons  
94 have revealed that several *r-opsins* expressed in these receptors are required  
95 for proper mechanosensation, and suggest that this function is light-  
96 independent [15,16]. These functional findings add new perspectives to older  
97 observations that a subset of mechanosensory cells (to which JO and ChO  
98 cells belong) exhibit significant similarities in their molecular specification  
99 cascade with eye photoreceptors, comprising analogous use of Pax, Atonal,  
100 or Pou4f3 transcription factors [19]. If r-Opsins are to be considered as part of  
101 a shared molecular signature in photosensory and mechanosensory cells, this  
102 raises divergent possibilities for the evolution of r-Opsin-positive sensory cells:  
103 (i) Could r-Opsins have evolved as ancient “protosensory” molecules that  
104 were primarily engaged in mechanosensation, only to secondarily evolve to  
105 become light receptive, and helping photoreceptors to emerge as a distinct  
106 cell type? (ii) Conversely, does the canonical function of r-Opsins in light  
107 reception reflect their ancestral role, with r-Opsin-dependent  
108 mechanoreceptors representing a secondary evolutionary modification? Or  
109 (iii) are there ways in which photosensory functions of r-Opsins could have  
110 played an ancient role in mechanoreceptors, even if this role might not be  
111 present any more in the investigated *Drosophila* mechanoreceptors?

112 In order to gain insight into these questions of r-Opsin function, and into the  
113 evolution of sensory systems from an independent branch of animal evolution,  
114 we characterized *r-opsin*-expressing cells in a lophotrochozoan model

115 system, the marine annelid *Platynereis dumerilii* that is amenable to functional  
116 genetic analyses [20-22]. After its pelagic larval stage, *P. dumerilii* inhabits  
117 benthic zones [23] that are characterized by a complex light environment,  
118 making it likely that light-sensory systems have been evolutionarily preserved  
119 in this model, rather than being secondarily reduced. In line with this,  
120 *Platynereis* has retained an evolutionarily representative set of *r-opsins* [2,24]  
121 and other photoreceptor genes. The *Platynereis r-opsin1* gene is not only  
122 expressed in EPs [2], but also in peripheral cells along the trunk of the animal  
123 [17] (cells referred to in this study as trunk *r-opsin1* expressing / TRE cells),  
124 making the worm an attractive species for a comparative assessment of r-  
125 Opsin function between cephalic and non-cephalic cell types. While both EP  
126 and TRE cells express the *gaq* gene that encodes a G<sub>αq</sub> subunit [17], it has  
127 remained elusive whether the TRE cells represent a segmental repetition of  
128 the EP cell type along the body plan or represent a distinct sensory modality.  
129 Likewise, it is unclear whether r-Opsin1 in TRE cells has a light-sensory role,  
130 as in the EPs, or serves a light-independent function, as has been suggested  
131 for *Drosophila* JO or ChO neurons.

132 Here, we established a dissociation and fluorescence-activated cell sorting  
133 (FACS) protocol for the *Platynereis* pMos{rops::egfp}<sup>vbc12</sup> strain that expresses  
134 enhanced GFP (EGFP) under the regulatory control of the *Platynereis r-*  
135 *opsin1* gene in both EP and TRE cells [17], and combined this strategy with  
136 the targeted mutagenesis of the endogenous *r-opsin1* locus, and an  
137 experimental characterization of the r-Opsin1 action spectrum. This allowed  
138 us to determine molecular profiles for both EP and TRE cells, revealed that  
139 TRE cells, but not EP cells, possess a mechanosensory signature and  
140 uncovered that, specifically in the TREs, light – mediated by r-Opsin1 –  
141 adjusts the expression level of a plasma membrane calcium transporter  
142 relevant for auditory mechanosensation in vertebrates. Our data, therefore,  
143 suggest that TRE cells represent a distinct mechanoreceptive cell type, in  
144 which r-Opsin1, in difference to the current *Drosophila*-based paradigms,  
145 elicits light-dependent functional changes. In line with this, a newly  
146 established deep-learning-based approach revealed light-dependent  
147 behavioral differences between wildtype and *r-opsin1* mutant trunks. Our

148 results are consistent with the idea that photo- and mechanosensory systems  
149 have a common evolutionary origin in a multimodal sensory cell type.

## 150 RESULTS

### 151 **Shared and distinct molecular signatures of eye photoreceptor and** 152 **trunk *r-opsin1*-expressing cells**

153 In order to gain insights into the molecular signatures of EP and TRE cells, we  
154 established a mechanical dissociation protocol compatible with FACS, and  
155 benchmarked to minimize cell death. We next dissected heads and trunks of  
156 the same  $pMos\{rops::egfp\}^{vbci2}$  individuals (**Fig. 1A**), isolated EGFP-positive  
157 cells from heads and trunks, and established transcriptomes for both sorted  
158 and unsorted cells using Illumina HiSeq sequencing on cDNA amplified by the  
159 Smart-Seq2 protocol [25] (**Fig. 1B**). Gates for FACS (**Fig. 1C,D**) were  
160 calibrated using dissociated cells from wildtype heads (**Fig.1- figure**  
161 **supplement 1A**) and trunks (**Fig.1-figure supplement 1B**), to exclude  
162 isolation of autofluorescent cells.

163 To validate the sampling strategy, we investigated if this procedure  
164 reproduced expected results for genes known to be enriched in both EP and  
165 TRE cells. Both *r-opsin1* and *egfp* were up to several thousand times more  
166 abundant in libraries derived from EGFP-positive cells than in those of  
167 unsorted cells (**Fig. 1E,F**). In further support of successful enrichment,  
168 signatures of EGFP-positive cells were consistently enriched in the *gq* gene  
169 encoding the G alpha subunit *Gαq* (**Fig. 1G**). *Gq* was previously shown to be  
170 strongly expressed in EP and TRE cells [17]. By contrast, the genes encoding  
171 the ribosomal subunit *Rps9* or the Polo-like Kinase *Cdc5*, previously  
172 established as internal controls for gene expression quantification  
173 experiments [26], were not enriched in either EP or TRE cell populations (**Fig.**  
174 **1-figure supplement 1C,D**).

175 As these results indicated that the experimental procedure allowed for  
176 significant enrichment and profiling of EP and TRE cells, we next used EdgeR  
177 [27] to systematically calculate enrichment scores for each of the EGFP-  
178 positive populations, compared to the combined set of head and trunk  
179 unsorted cells. From a total of 39575 genes, we determined a set of 278

180 genes (0.7%) to be significantly enriched in EP cells, and a set of 361 genes  
181 (0.9 %) significantly enriched in TRE cells (FDR < 0.05) (**Fig. 2A**). 133 genes  
182 (0.3 % of total) were shared between the EP and TRE cells (common EP-  
183 /TRE-enriched genes), including, expectedly, *r-opsin1* and *gq* (**Figure 2-**  
184 **figure supplement 2**), and leaving 145 (0.4 % of total) EP-specific genes,  
185 and 228 (0.6 % of total) TRE-specific genes (**Fig. 2A**). Experiments on  
186 selected genes (see Methods: “Analysis and validation of differentially  
187 expressed genes”, **Figure 2- figure supplement 1**, **Figure 2- figure**  
188 **supplement 2**) allowed us to validate the specificity of the predicted sets  
189 (**Figure 2- figure supplement 3**, **Figure 2- figure supplement 4**), pointing at  
190 both shared and distinct properties of the *r-opsin1*-expressing cells of the  
191 head and the trunk.

192 Previous analyses had already revealed several genes to be expressed in  
193 adult EPs: *vesicular glutamate transporter (vglut)* [28,29], the rhabdomeric  
194 opsin gene *r-opsin3* [24], the G<sub>o</sub>-type opsin gene *G<sub>o</sub>-opsin1* [21,30], and the  
195 light-receptive cryptochrome gene *I-cry* [26]. *r-opsin3*, *G<sub>o</sub>-opsin1* and *I-cry*  
196 were all significantly enriched in the EP-derived transcriptome, when  
197 compared to unsorted head cells. While *r-opsin3* has already been described  
198 to be expressed in TREs [24], also *G<sub>o</sub>-opsin1* and *I-cry* were part of the  
199 specific TRE transcriptome, pointing at an unexpected complexity of light  
200 receptors in the TRE cells, and a similar equipment of EP and TRE cells with  
201 photoreceptive molecules. Our sequencing data did not cover the published  
202 *vglut* gene in any of the samples (possibly reflecting low expression in the  
203 adult).

204 As to potential differences between EPs and TREs, prior analyses had  
205 pointed to the expression of circadian clock genes in the EPs and the  
206 adjacent brain lobes [26], and both classical and molecular studies suggested  
207 the retina as a site of continuous neurogenic activity [31,32], contrasting with  
208 the appearance of the TREs as sparse, differentiated neurons [17]. In line with  
209 these expectations, we found the EP-, but not TRE-derived transcriptomes to  
210 be enriched, respectively, in the circadian clock gene *bmal*, as well as a  
211 homolog of the *embryonic lethal, abnormal vision/elav* gene, a marker  
212 characteristic for committed neurons [33,34].

## 213 **EP and TRE cells share a complete phototransduction pathway**

214 Building on these initial results, we next explored if the identified gene sets  
215 could provide additional insights into the function and evolution of the TRE  
216 cells. We first assessed whether molecular data in addition to the identified  
217 photoreceptor molecules would support a possible function of TRE cells in  
218 light sensitivity, as it would be expected if these cells represented segmentally  
219 repeated cell type homologs of the *P. dumerilii* and *Drosophila melanogaster*  
220 EP cells. To test this hypothesis, we compared EP- and TRE-enriched genes  
221 of our bristleworm with a published set of genes enriched in *Drosophila* EP  
222 cells [35].

223 Using BLAST-based homology relationships between *D. melanogaster* and *P.*  
224 *dumerilii* genes (see Methods), we established a set of 408 *bona fide P.*  
225 *dumerilii* homologs of the 743 *D. melanogaster* EP-enriched genes. 9 of these  
226 were common EP-/TRE-enriched genes. A statistical analysis, based on the  
227 generation of  $10^4$  sets of 743 randomly-picked *D. melanogaster* genes (see  
228 Methods), indicated that this number of common EP-/TRE-enriched genes  
229 significantly exceeds random expectation (**Fig. 3- figure supplement 1A**,  $p =$   
230 0.024). Among these 9 overlapping genes, we found 5 *bona fide P. dumerilii*  
231 homologs of genes known to be involved in the r-Op sin phototransduction  
232 pathway described for *Drosophila* EP cells [4] (yellow box in **Fig. 3- figure**  
233 **supplement 1B**). By extending our assessment to *bona fide* homologs of  
234 additional components of the *Drosophila* r-Op sin phototransduction pathway,  
235 we found that putative homologs of 9 and 8 of the 12 components of the r-  
236 Op sin phototransduction pathway are enriched in the *P. dumerilii* EP and TRE  
237 cells, respectively (**Fig. 2B**). Statistical analysis with  $10^4$  random gene sets of  
238 matching size (see Methods) revealed these results to be highly significant ( $p$   
239  $< 10^{-4}$ , for both EP and TRE). Of note, all 12 components of the r-Op sin  
240 phototransduction pathway were found to be expressed in the TRE cells of *P.*  
241 *dumerilii* (**Fig. 2B,C**) ( $p < 10^{-4}$ ).

## 242 **TRE cells combine photo- and mechanosensory molecular** 243 **signatures**

244 Following the same strategy, to further explore potential additional functions of  
245 the TRE cells, we next tested the molecular relationship between the worm's



246 TREs and the r-Opin-expressing, mechanosensory JO neurons of  
247 *Drosophila*. For this, we took advantage of 101 genes identified as JO neuron  
248 specific in a microarray analysis [15], and 80 *P. dumerilii* homologs of these.  
249 Significant subsets of these were found in the common EP-/TRE-enriched  
250 signature (9 genes;  $p < 10^{-4}$ ), and the TRE-specific signature (7 genes;  $p =$   
251  $1.3 \times 10^{-3}$ ) (**Fig. 3A**). The common EP-/TRE-enriched genes essentially reflect  
252 the *P. dumerilii* homologs of the aforementioned phototransduction pathway  
253 (*rh3/rh4*, *rh5/rh6*, *trp/trpl*, *norpa*, *g $\beta$ 76c*, *pip5k59b*, *arr2* and *klp68D*; **Fig. 3B**).  
254 This finding indicates that not only rhodopsin genes are present in JO  
255 neurons, as reported [15], but that JO neurons possess a complete r-Opin  
256 phototransduction machinery.

257 Given the well-established function of JO neurons as mechanosensory cells,  
258 we next investigated whether the additional, statistically significant overlap  
259 between JO-specific genes and TRE-specific genes reflected any shared  
260 mechanosensory signature. Among the 7 JO-specific genes overlapping with  
261 TRE-specific genes, 2 were shown [15] to be required for the normal  
262 response of JO neurons to mechanical stimuli (*gl* and *wtrw*; matching  
263 *Platynereis trpA/c7677*; **Fig. 3C-E**), adding to the 4 (of 9) specifically shared  
264 genes from the joined TRE/EP set with known mechanical functions (asterisks  
265 in **Fig. 3B**), whereas the other 5 have not been tested for mechanosensory  
266 functions. In order to compensate for this lack of functional information, we  
267 also performed a comparison with mouse, where the largest number of genes  
268 involved in mechanosensation is known. We systematically determined  
269 putative *P. dumerilii* homologs of all mouse genes assigned to the gene  
270 ontology (GO) category “sensory perception of mechanical stimulus”  
271 (GO:0050954), and then assessed their overlap with EP or TRE expressed  
272 genes (**Fig. 3F,G**). Indeed, these homologs are significantly overrepresented  
273 in the TRE-specific signature ( $p=0.029$ ; **Fig. 3G**). Similar analyses with GO  
274 categories for other sensory perception modalities associated to the JO, such  
275 as “sensory perception of temperature stimulus” (GO:0050951) and “sensory  
276 perception of pain” (GO:0019233), showed no statistically significant results  
277 (**Fig. 3H,I**).

278 A closer analysis of those mouse mechanosensory genes whose bristleworm  
279 counterparts are expressed in TRE cells (**Fig. 3- figure supplement 2**),

280 points at a gene signature shared between TRE cells and mouse inner ear  
281 hair (IEH) cells: 18 out of the 19 TRE-specific gene homologs have reported  
282 effects on hearing function in the mouse (yellow shading in **Fig. 3- figure**  
283 **supplement 2**). Notably, *whrn*, *dnm1*, *atp8b1*, *myo3a*, *chrna9* and *tecta* have  
284 been shown to be required for vertebrate IEH cell function [36-40]; *sox2* and  
285 *jag2* are known to be required for development of vertebrate IEH cells [41,42];  
286 *crym*, *serpinb6a* and *myh14* lead to hearing loss when mutated in mammals  
287 [43-46]. Again, we assessed the specificity of this finding by systematically  
288 comparing the overlap with mouse genes involved in distinct modalities of  
289 mechanosensation, confirming a statistically significant overlap between  
290 mouse hearing genes and *P. dumerilii* TRE-specific genes ( $p=0.0087$ ; **Fig.**  
291 **3J**), whereas other mechanosensory modalities yielded no statistically  
292 significant results (**Fig. 3K**). Even though additional functions, unrelated to  
293 mechanosensation, are known for some of the above genes, these statistical  
294 results strongly argue for a gene signature specifically shared between *P.*  
295 *dumerilii* TRE cells and mouse IEH cells.

296 The shared mechanosensory transcriptome signature of *P. dumerilii* TRE  
297 cells, *Drosophila* JO neurons and mouse IEH cells is consistent with the  
298 possibility that TRE cells retain a combination of mechano- and photosensory  
299 molecular features, as they were previously suggested to form a likely  
300 ancestral protosensory state [19,47,48]. A deeper molecular relationship  
301 between these cells is further reinforced by the observation that the worm's  
302 TRE cells differentiate out of a territory that expresses the gene encoding for  
303 the transcription factor Pax2/5/8 [17]. Similarly, differentiation of JO neurons  
304 and mouse IEH cells requires respective *Drosophila* (*spa*) and mouse (*pax2*)  
305 orthologs. Similarly, TRE cells have been linked to expression of *brn3/pou4f3*  
306 [17], a *Platynereis* ortholog of the vertebrate *pou4f3* gene demarcating the  
307 neuromasts of the fish lateral line [49], a set of mechanosensory structures  
308 that also express fish r-Opsin orthologs [17].

309

310 ***P. dumerilii* r-Op sin1 mediates blue light reception through  $G\alpha_q$**   
311 **signaling**

312 As a prerequisite for a deeper analysis of the function of r-Op sin1 in the TRE  
313 cells of *P. dumerilii*, we next set out to characterize the photosensory  
314 properties of this Op sin. A distinctive feature of r-Op sin phototransduction  
315 cascade is the coupling and light-dependent activation of the  $G\alpha_q$  protein by r-  
316 Op sin [50]. Amphioxus, chicken and human Melanopsins – orthologs of  
317 *Drosophila* r-Op sins – have all been shown to elicit intracellular calcium  
318 increase in response to light, and that all of these are capable of activating the  
319  $G\alpha_q$  protein in a light-dependent manner [51]. Given that *P. dumerilii* r-Op sin1  
320 is an ortholog of *Drosophila* r-Op sins and chordate Melanopsins [2,52], we  
321 tested if *P. dumerilii* r-Op sin1 can also activate  $G\alpha_q$  signaling upon light  
322 exposure by employing a cell culture second messenger assay [51] (see  
323 Methods). *P. dumerilii* r-opsin1-transfected HEK293 cells exhibited a  
324 significant response to light exposure, similar to the human Melanopsin  
325 (positive control) (**Fig. 4A**). By contrast, using corresponding assays for  $G\alpha_s$   
326 or  $G\alpha_{i/o}$  activation [51,53], we detected no activation of either  $G\alpha_s$  (**Fig.4-**  
327 **figure supplement 1A**) or  $G\alpha_{i/o}$  (**Fig.4- figure supplement 1B**) by *P.*  
328 *dumerilii* r-Op sin1. This indicates that *Platynereis* r-Op sin1 specifically  
329 activates  $G\alpha_q$ , similar to *Drosophila* r-Op sins.

330 The relative responsiveness of a photoreceptor cell to different wavelengths of  
331 light is a fundamental determinant of its sensory capabilities. We therefore  
332 next determined the spectral sensitivity of *P. dumerilii* r-Op sin1, using our  
333 HEK293 cells second messenger assay to measure changes in calcium  
334 concentration in response to near monochromatic stimuli spanning the visible  
335 spectrum (**Fig.4- figure supplement 1C-F**). The  $EC_{50}$  values (irradiance  
336 required to elicit 50% response; see **Fig.4- figure supplement 1F**) of  
337 sigmoidal dose response curves were converted to a relative sensitivity and  
338 fitted with an opsin:retinaldehyde pigment template function [54]. The optimal  
339  $\lambda_{max}$  for the template was determined by least squares as 471 nm (**Fig. 4B,C**).  
340 *P. dumerilii* r-Op sin1 therefore maximally absorbs light in the blue range,  
341 similar to other r-Op sin orthologs, such as human Melanopsin, which exhibits  
342 a  $\lambda_{max}$  of around 480 nm [51].

343 In summary, the presence of all components of the r-Op sin phototransduction  
344 pathway in TRE cells, and our demonstration that *P. dumerilii* r-Op sin1 is  
345 capable of activating  $G\alpha_q$ , strongly suggests that EP and TRE cells can  
346 respond to light.

347

### 348 **Mutation of *r-opsin1* affects TRE-specific, light-dependent** 349 **expression of an *Atp2b* calcium channel involved in hearing**

350 In order to gain insight into the function of r-Op sin1 in TRE cells, we  
351 generated two independent *r-opsin1* alleles (*r-opsin1* <sup>$\Delta 1$</sup>  and *r-opsin1* <sup>$\Delta 17$</sup> ) in the  
352 background of the *pMos{rops::egfp}*<sup>*vbc2*</sup> strain by TALENs [20], resulting in  
353 premature stop codons in the 5' coding region of the *r-opsin1* gene (**Fig.**  
354 **4D,E**). Founders were outcrossed to wild-type worms (PIN and VIO strains).  
355 Subsequently, trans heterozygous individuals (*r-opsin1* <sup>$\Delta 1/\Delta 17$</sup> ;  
356 *pMos{rops::egfp}*<sup>*vbc2*</sup>+) were used to systematically analyze the molecular  
357 profile of EGFP-positive head and trunk cells as described above. Sampling  
358 from related EGFP-positive non-mutant specimens (*r-opsin1*<sup>*+/+*</sup>;  
359 *pMos{rops::egfp}*<sup>*vbc2*</sup>+) served as controls to match mutant vs non-mutant  
360 profiles. Based on our spectral sensitivity results for r-Op sin1, specimens  
361 were kept under monochromatic blue light (~470 nm, i.e. the  $\lambda_{max}$  of r-Op sin1),  
362 for 3 – 5 days until dissociation for FACS.

363 We next identified the genes differentially expressed between the EP or TRE  
364 cells of mutant vs non-mutant worms using the EdgeR algorithm. Genes with  
365 an FDR < 0.05 were considered significantly differentially expressed. We then  
366 focused on the *P. dumerilii* homologs of all mouse hearing genes that were  
367 expressed in either EP or TRE cells of mutant or non-mutant worms. In the  
368 EP cells, none of these candidate genes was significantly differentially  
369 expressed between mutant and non-mutant worms. By contrast, one gene  
370 (*atp2b/c7424*, *P. dumerilii* homolog of mouse *atp2b2*; **Fig.5- figure**  
371 **supplement 1A**, red arrowhead) was significantly depleted in mutant TRE  
372 cells compared to wild-type cells (FDR = 0.010; **Fig. 5A**). The specificity of  
373 this regulation is further supported by the fact that none of the identified  
374 phototransduction components were changed.

375 The *atp2b2* gene encodes a plasma membrane calcium-transporting ATPase,  
376 which is expressed in the stereocilia of mechanosensory cells of the murine  
377 cochlea and vestibular system [55]. Homozygous *atp2b2* mutant mice show  
378 balance deficits and are deaf, while heterozygous mutants show partial loss of  
379 auditory ability [56]. These differential effects caused by different genetic  
380 dosages of *atp2b2* are consistent with the possibility that regulation of *atp2b2*  
381 expression could be a natural mechanism to modulate mechanosensory cell  
382 function. In support of an ancestral role of the plasma membrane calcium-  
383 transporting ATPase gene family in modulating neuronal sensitivity, the single  
384 *Drosophila* representative of this family, *pmca* (**Fig.5- figure supplement 1A**,  
385 light blue arrowhead), modulates the thermal sensitivity of motor neurons [57].  
386 Its *C. elegans* ortholog, *mca-3* (**Fig.5- figure supplement 1A**, green  
387 arrowhead), modulates touch sensitivity of the touch neurons [58].  
388 Furthermore, in zebrafish, *atp2b2* (**Fig.5- figure supplement 1A**, dark blue  
389 arrowhead) is highly enriched in the *r-opsin*-expressing mechanosensory  
390 neuromasts of the lateral line (**Fig.5- figure supplement 1B**), consistent with  
391 a potential mechanosensory function of the gene in this organism.  
392 Since the expression levels of *atp2b/c7424* in *Platynereis* TREs depend on *r-*  
393 *opsin1* function, we wondered if they might also depend on illumination.  
394 Decapitated worm trunks are functionally relatively autonomous, maintain  
395 their ability to crawl and swim, aspects of their rhythmicity and live for up to  
396 two weeks (**Fig. 5B**) [59]. We cultured decapitated trunks of  
397 pMos{rops::egfp}<sup>vbc12</sup> worms for 3-5 days in two distinct light conditions: (i)  
398 bright monochromatic blue light (~470 nm); and (ii) very dim white light (**Fig.**  
399 **5C**). Light intensity at the  $\lambda_{\max}$  of r-Opsin1 (471 nm) was ~40 fold reduced in  
400 the dim light condition compared to bright blue light (blue circles in **Fig. 5C**).  
401 TRE cells were isolated and profiled as before. Statistical analysis showed  
402 that *atp2b/c7424* is significantly downregulated in dim light conditions as  
403 compared to bright light ( $p=0.02$ ; Wilcoxon rank sum test; **Fig. 5D**), similar to  
404 the downregulation observed in mutant worms ( $p=0.02$ ; Wilcoxon rank sum  
405 test; **Fig. 5A**). These results indicate that blue light levels modulate  
406 *atp2b/c7424* expression levels in TRE cells, and suggest that the light-  
407 dependent modulation is majorly mediated by r-Opsin1.

408 **r-Op sin1 mediates a light-dependent modulation of undulation**  
409 **frequency**

410 Given the functional relevance of *atp2b2* gene dosage in mammalian hearing,  
411 and its enrichment in zebrafish mechanosensory cells known to express *r-*  
412 *opsin* orthologs *opn4xb* and *opn4.1* [17] (**Fig.5- figure supplement 1B**), we  
413 hypothesized that the regulation of *atp2b/c7424* in TRE cells might correlate  
414 with altered mechanosensory abilities. We therefore set out to test the impact  
415 of changed light conditions as well as different genotypes on worm behavior.  
416 Classical studies have provided evidence for the existence of several classes  
417 of mechanosensory cells in parapodia of annelids. These include stretch-  
418 sensitive flap receptors, bristle receptors and acicular receptors [60,61]. A  
419 plausible function of these receptors is to fine-tune motor patterns associated  
420 with directional (crawling) or stationary (undulation) movements that require  
421 coordinated activity by individual segments.

422 In a first experiment to assess the possible requirement of *r-opsin1* for  
423 coordinated segmental movements, we assessed the crawling movement  
424 exhibited by decapitated trunks when stimulated by a focal bright light  
425 stimulus [17]. Transheterozygous *r-opsin1*<sup>Δ1/Δ17</sup> individuals clearly responded  
426 to such stimuli, but exhibited a significantly reduced net distance when  
427 compared to wild-type animals (p=0.02; Wilcoxon rank sum test; **Fig.5- figure**  
428 **supplement 2**). Whereas this result is consistent with the notion that r-Op sin1  
429 is involved in the correct execution of motor movements, the experiment does  
430 not discriminate between r-Op sin1 triggering the response and/or modulating  
431 its motor execution.

432 We therefore decided to investigate a very regularly performed behavior that  
433 does not require light as a stimulus. Annelids from the *Platynereis* genus  
434 exhibit a stereotypical undulatory behavior that is thought to increase water  
435 flow and oxygenation [62]. The presence of this behavior in *Platynereis*  
436 *dumerilii* is seemingly independent of time [26], and requires a tight  
437 coordination between segments. Thus, we reasoned that if r-Op sin1 in the  
438 segmentally arranged TRE cells plays a role in the modulation of motor  
439 movements, this behavior presents a good test. We recorded the movement  
440 of *r-opsin1* mutant and wild-type trunks of de-capitated worms for five

441 consecutive days, using a previously established infrared video system [63].  
442 Concerning visible light conditions, during the first 1.5 days, recorded worms  
443 were kept under a light/dark (LD) regime of 16:8 hours, followed by constant  
444 darkness (DD, **Fig. 5E**). We then established a deep-learning-based  
445 quantitative behavioral approach to analyze the resulting movies. We trained  
446 a neural network to detect 7 different body positions: *jaws*, *body1-body5*, *tail*  
447 (**Fig.5- figure supplement 3A**) across the total length of each movie. Next,  
448 we analyzed 10-second intervals of the movie to identify oscillatory behavior  
449 of the *body1* through *body5* points, using a periodogram algorithm,  
450 categorizing each interval into undulatory or non-undulatory behavior. This  
451 automated analytical setup was benchmarked against human observations of  
452 a portion of the movies (**Fig.5- figure supplement 3B,C**). It allowed us to  
453 systematically determine the ratio of time that specimens spent undulating  
454 compared to the overall time (**Fig. 5F,G**). In turn, this permitted us to compare  
455 both the effect of *r-opsin1* mutation (red graphs in **Fig. 5F,G**) to wild-types  
456 (black graphs in **Fig. 5F,G**) and the effect of illumination (day, **Fig. 5F**)  
457 compared to darkness (subjective day, **Fig. 5G**) in equivalent windows of  
458 circadian time.

459 Analyses on a total of 64 trunks revealed that wild-type (black graphs)  
460 exhibited a light-dependent modulation of the undulatory movements, which  
461 were higher during darkness (**Fig. 5F-H**). This modulation was abolished in *r-*  
462 *ops1*<sup>-/-</sup> worms, whose trunks exhibited equally high undulatory movements  
463 during light and dark (**Fig.5F-H**, red graphs). (Please note that in complete  
464 animals the difference between wild-type and mutants is also present, but the  
465 effect of light modulation on wild-type movements is inversed, data not  
466 shown.)

467 These result couple *r-opsin1* in TREs with their mechanosensory molecular  
468 signature with the light-dependent modulation of regular behavioral  
469 movements.

## 470 DISCUSSION

471 Shared and distinct molecular signatures, like those we derived from FAC-  
472 sorted EP and TRE cells, are valuable substrates for inferring cell type  
473 divergence and evolution [64-66]. Our finding that both *Platynereis* TRE cells

474 and *Drosophila* JO neurons retain a close-to-complete r-Opsin  
475 phototransduction machinery suggests as most parsimonious explanation that  
476 *r-opsin*-expressing photo- and mechanoreceptors are cell types that arose  
477 from a common ancestral cell type early in animal evolution. This notion is  
478 supported by the fact that photoreceptive and mechanoreceptive cells rely  
479 both on shared specification factors such as *atonal/Atonal2/5* and *pou4f3*  
480 [19,48,67], and by distinct ones that have arisen by gene duplication, such the  
481 Pax genes *pax6/ey* – primarily associated with eye photoreceptors – and  
482 *pax2/5/8/spa* – primarily associated with mechanoreceptive cells [19,47,67]. In  
483 accordance with this notion, development of the worm’s TRE cells, found here  
484 to exhibit a mechanosensory signature, has been linked to *brn3/pou4f3* and  
485 *pax2/5/8* [17], and cnidarian PaxB, a transcription factor that combines  
486 features of both Pax6/Ey and Pax2/5/8/Spa has been shown to be involved in  
487 the formation of the rhopalia in the Cubozoan jellyfish *Tripedalia cristophora*  
488 [67]. The rhopalia are sensory structures that combine photo- and  
489 mechanosensory functions. Our observation that EP and TRE cells also  
490 express deep homologs of the Transient receptor potential (Trp) channel  
491 family (TrpC and TrpA, respectively, **Fig. 3C**) not only adds to this concept on  
492 the level of effector molecules, but also argues that the ancient cell type  
493 already possessed one or more sensors for membrane stretch. Similarly, the  
494 close molecular relationships between mechanosensory cells of the lateral  
495 line and ear and photosensory cell types present during vertebrate  
496 development (reviewed in [68]), and the uncovered genetic links between ear-  
497 and eye defects revealed in human conditions such as the Usher syndrome  
498 [69] might also reflect such a deep homology in the specification of sensory  
499 cells.

500 Based on the observation that rhabdomeric Opsins appear to serve light-  
501 independent structural roles in the fly’s mechanosensory cells of the JO and  
502 ChO, it has been suggested that such light-independent, cell-mechanical roles  
503 are the ancestral function of animal r-Opsins [16,70]. However, r-Opsins only  
504 constitute one of nine Opsin families that already existed at the dawn of  
505 bilaterian evolution, and light sensitivity is a common feature of its extant  
506 members [3]. Thus, the evolutionary hypothesis of an ancestral primary non-  
507 light sensory function of one bilaterian subgroup either implies that light



508 sensitivity evolved independently in distinct Opsin groups, or that r-Opsins  
509 would have undergone a loss of light sensitivity prior to evolving this feature  
510 again. A more plausible explanation is that light sensitivity is an ancient  
511 feature of r-Opsins, and that the close association of r-Opsins and certain  
512 mechanosensors reflects an ancestral role of light in such cells.

513 Indeed, our data are consistent with a concept in which Opsins endow  
514 mechanoreceptors with the ability to tune their responses in response to  
515 environmental light conditions, on at least two levels: A first level are light- and  
516 *r-opsin1*-dependent changes in transcript levels of *atp2b/c7424*. As ATP2B2  
517 is an ion transport ATPase, which removes  $\text{Ca}^{2+}$  from the cytoplasm, different  
518 expression levels of this enzyme can impact on the time after which a neuron  
519 will return to its resting state. Thereby, changing *atp2b* levels likely modulates  
520 signal transduction and/or refractory period of cells, resulting in overall  
521 changes in receptor sensitivity. This model is consistent with both the  
522 relevance of *r-opsin1* for tuning the undulatory behavior of trunks to ambient  
523 light conditions in the bristleworm, and the differential effects of different  
524 genetic dosages of *atp2b2* (homozygous vs. heterozygous state) in mice [56].  
525 While we have not directly assessed the speed by which *atp2b/c7424*  
526 transcript-levels are modulated, such changes would be expected to take  
527 place on the scale of minutes to hours, thus providing a slow adjustment of  
528 signaling potential.

529 A second mechanism by which r-Opsins could modulate mechanosensation  
530 more acutely is provided by the photomechanical response that was  
531 uncovered by the study of *Drosophila* EP function [71]. Specifically, this model  
532 proposes that Opsin-induced, phospholipase C-mediated  $\text{PIP}_2$  cleavage  
533 results in a fast-propagating change in photoreceptor bilayer curvature that  
534 then triggers stretch-sensitive TRP-C channels. Thereby, photon absorption  
535 (light reception) is effectively translated into a local stretch signal as it is at the  
536 core of various mechanosensory cell types. Given that this mechanism seems  
537 to account for a canonical photoreceptive function of r-Opsin in EP cells, the  
538 conservation of *r-opsin* expression along with the respective signaling  
539 machinery suggests that Opsin activation in mechanoreceptive cells may well  
540 acutely tune the membrane curvature and thus the ability of stretch receptors  
541 to be activated.

542 From an ecological perspective, a light-modulatory function could effectively  
543 serve to adjust mechanosensory functions in species exposed to varying light  
544 conditions, allowing them to tune mechanoreceptive responses to ambient  
545 light. Whereas our functional results are restricted to the bristleworm model,  
546 we reason that a modulatory function as proposed here might plausibly also  
547 reflect the functionality of an ancestral “protosensory” cell [47], that could  
548 subsequently have been subfunctionalized into dedicated light sensory and  
549 mechanoreceptive cell types. From this perspective, the absence of apparent  
550 light sensitivity in *Drosophila* JO or ChO neurons likely represent secondary  
551 evolutionary processes rather than ancestral conditions. Likewise, similar  
552 principles might apply to the apparent light-independent functions of r-Opsins  
553 in chemosensory cells suggested by recent experiments in the fruitfly [72], as  
554 chemosensory cells were also noted to share molecular signature with r-  
555 Opsin light sensors before [19]. Furthermore, we note that in specific neurons  
556 of the cnidarian *Hydra magnipapillata*, the signaling pathway downstream of a  
557 distinct Opsin class (Cnidops) has been suggested to modulate the discharge  
558 of neighboring cnidocytes, a complex cell type also exhibiting sensory  
559 functions [73,74]. It remains unclear if this link reflects parallel evolution or,  
560 alternatively, an even deeper link between Opsins and sensory cells. In either  
561 setting, however, this finding strengthens the notion that light modulation of  
562 animal mechanosensation is a fundamental principle.

563 Finally, our study also advances technology establishment for a “non-  
564 conventional model system” at multiples levels. First, the FACS-based  
565 protocol for cell type profiling employed here will be useful in the context of  
566 other non-conventional marine model organisms. Second, we anticipate that  
567 the automatic analyses of behavioral types by deep-learning based software  
568 tools will provide new opportunities to identify and quantify behavioral  
569 paradigms under different environmental and genetic conditions.

570

## 571 ACKNOWLEDGEMENTS

572 We thank the members of the Tessmar-Raible and Raible groups for  
573 discussions, and Andrij Belokurov, Margaryta Borysova and Netsanet

574 Getachew for help with worm care and genotyping at the Max Perutz Labs  
575 aquatic facility.

576 The research leading to these results has received funding from the European  
577 Research Council under the European Community's Seventh Framework  
578 Programme (FP7/2007–2013)/ERC Grant Agreement 260304 (F.R.) and ERC  
579 Grant Agreement 337011 (K.T.-R.); the research platforms 'Rhythms of Life'  
580 (K.T.-R., F.R., A.v.H.) and "Single-cell genomics of stem cells" (F.R.) of the  
581 University of Vienna; the Austrian Science Fund (FWF) START award, project  
582 Y413 (K.T.-R.); Austrian Science Fund (FWF) projects P28970 (K.T.-R.) and  
583 I2972 (F.R.). A.v.H and M.S. acknowledge financial support from the  
584 University of Vienna and the Medical University of Vienna. R.R. was  
585 supported by the Vienna International PostDoctoral Program for Molecular  
586 Life Sciences (VIPS).

587 None of the funding bodies was involved in the design of the study, the  
588 collection, analysis, and interpretation of data or in writing the manuscript.

## 589 **DECLARATION OF INTERESTS**

590 All authors declare no conflict of interest.

591 FIGURES

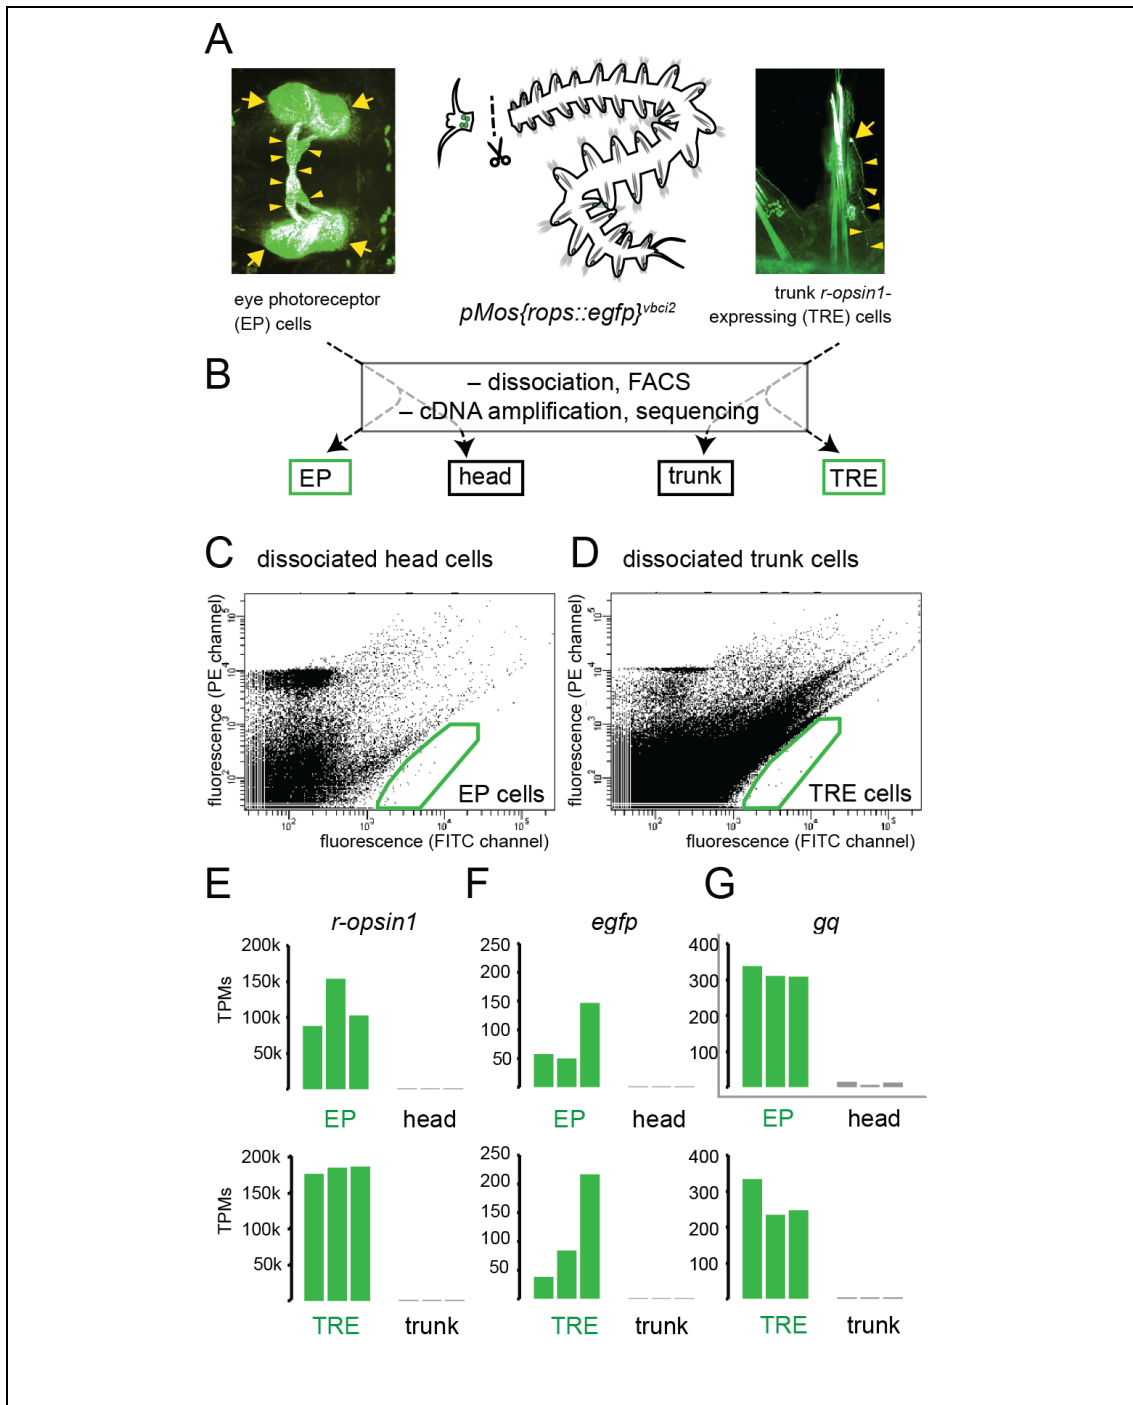

592 **Fig. 1. Establishment of molecular signatures of eye photoreceptors and trunk *r-opsin1*-**  
 593 **expressing cells. (A)** Dissection of *pMos{rops::egfp}<sup>vbc12</sup>* individuals, separating the head containing  
 594 eye photoreceptor (EP) cells (left panel) from trunk containing trunk *r-opsin1*-expressing (TRE) cells  
 595 (right panel). **(B)** Overview over processing and derived cDNA libraries, resulting in FACS-enriched (EP,  
 596 TRE) and unsorted (head, trunk) samples. **(C,D)** Representative FACS plots showing gated populations  
 597 (green boxes) of EP and TRE cells, respectively. For non-transgenic controls see [Fig. 1- figure](#)  
 598 [supplement 1A,B](#). **(E-G)** comparison of transcripts per million reads (TPM) for the genes *r-opsin1* (E),  
 599 *enhanced green fluorescent protein/egfp* (F), and *gαq/gq* (G) in individual replicates of EP, TRE,  
 600 and trunk libraries. For comparison of TPMs for non-enriched control genes see [Fig.1- figure](#)

601 **supplement 1C,D**. Arrows and arrowheads in (A) designate EGFP-positive cell bodies and projections,  
602 respectively.

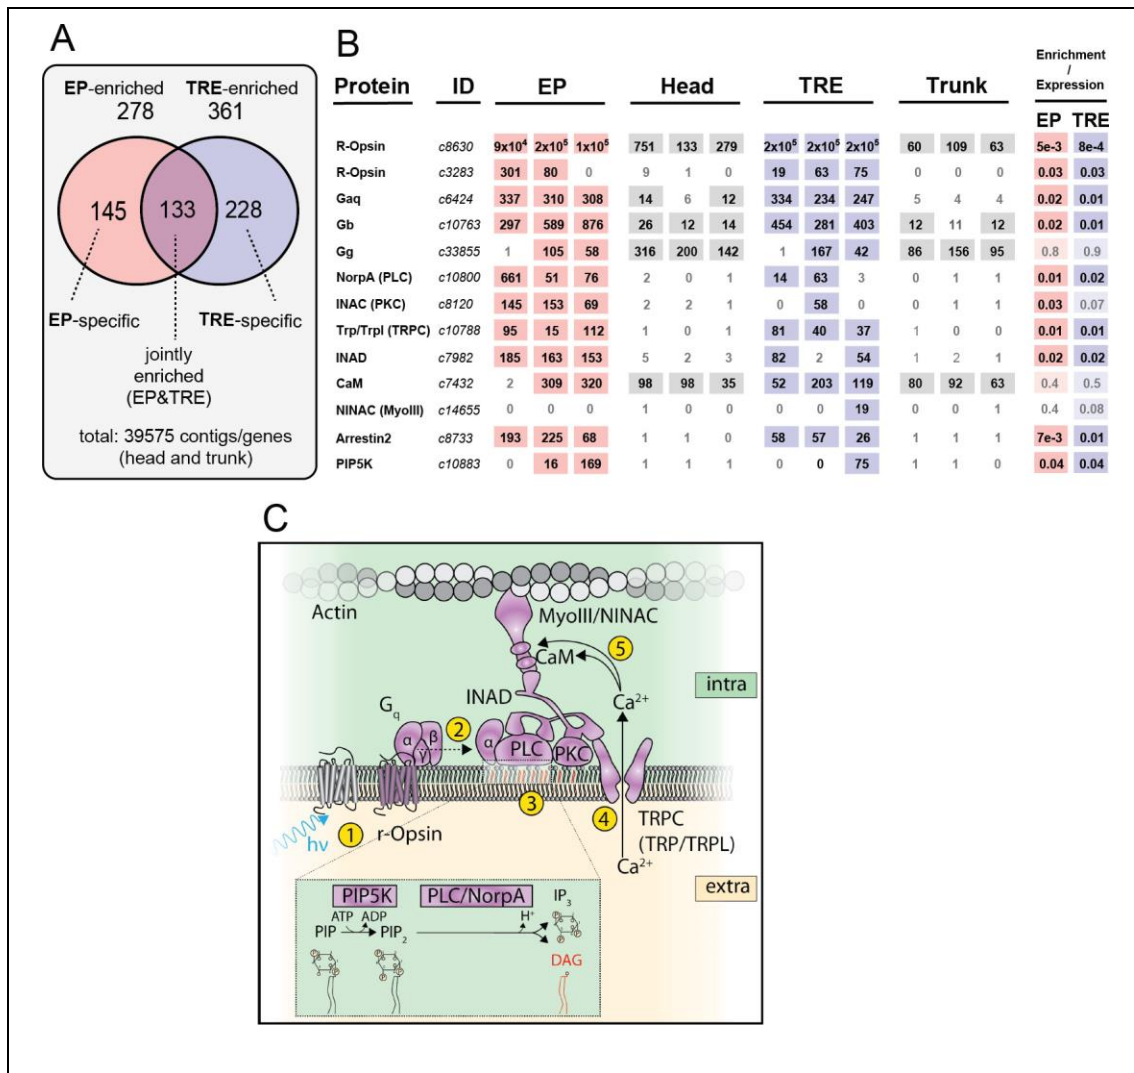

603 **Fig. 2. Trunk *r-opsin1*-expressing cells (TRE) share critical elements of the phototransduction**  
 604 **cascade with eye photoreceptors (EP).** (A) Summary of gene/contig counts enriched in EP and TRE  
 605 cells compared to the combined background (head & trunk; 39575 contigs), and their respective  
 606 overlap. For expression levels of genes selected for validation see [Fig.2- figure supplement 1](#). For  
 607 validation experiments see Methods: “Analysis and validation of differentially expressed genes”, [Fig.2-](#)  
 608 [figure supplement 2,3,4](#). (B) Expression and enrichment of phototransduction components in EP and  
 609 TRE cells. Protein: Key components of the *D. melanogaster* phototransduction pathway (cf. panel C).  
 610 ID: Corresponding gene ID of the *P. dumerilii* transcriptome. EP, Head, TRE, Trunk: Expression levels  
 611 (in TPMs) of the respective gene in individual replicates of *P. dumerilii* EP, head, TRE or trunk  
 612 libraries, respectively. Light shades indicate expression above the established threshold. Enrichment/Expression:  
 613 FDR values obtained from the differential expression analysis for EP or TRE cells. Dark shades indicate  
 614 significant enrichment, light shades expression without significant enrichment in the respective cell type.  
 615 Note that although the *P. dumerilii* best Blast hit to NINAC/MyoIII (*c14655*, E value: 3e-166) is not  
 616 expressed in EP cells, the second best Blast hit (*c8565*, E value: 1e-64) is expressed in these cells. For  
 617 sequence identifiers of the relevant *P. dumerilii* genes see [Fig.2- figure supplement 5](#). (C) Scheme  
 618 highlighting factors present or enriched in the joint EP/TRE signature (cf. panel B), and their function in  
 619 critical steps (yellow circles 1-5) of the canonical r-Opsin phototransduction cascade. Enlarged inset  
 620 shows relevant enzymatic steps in the intracellular leaflet. (C) modelled after ref. [4].

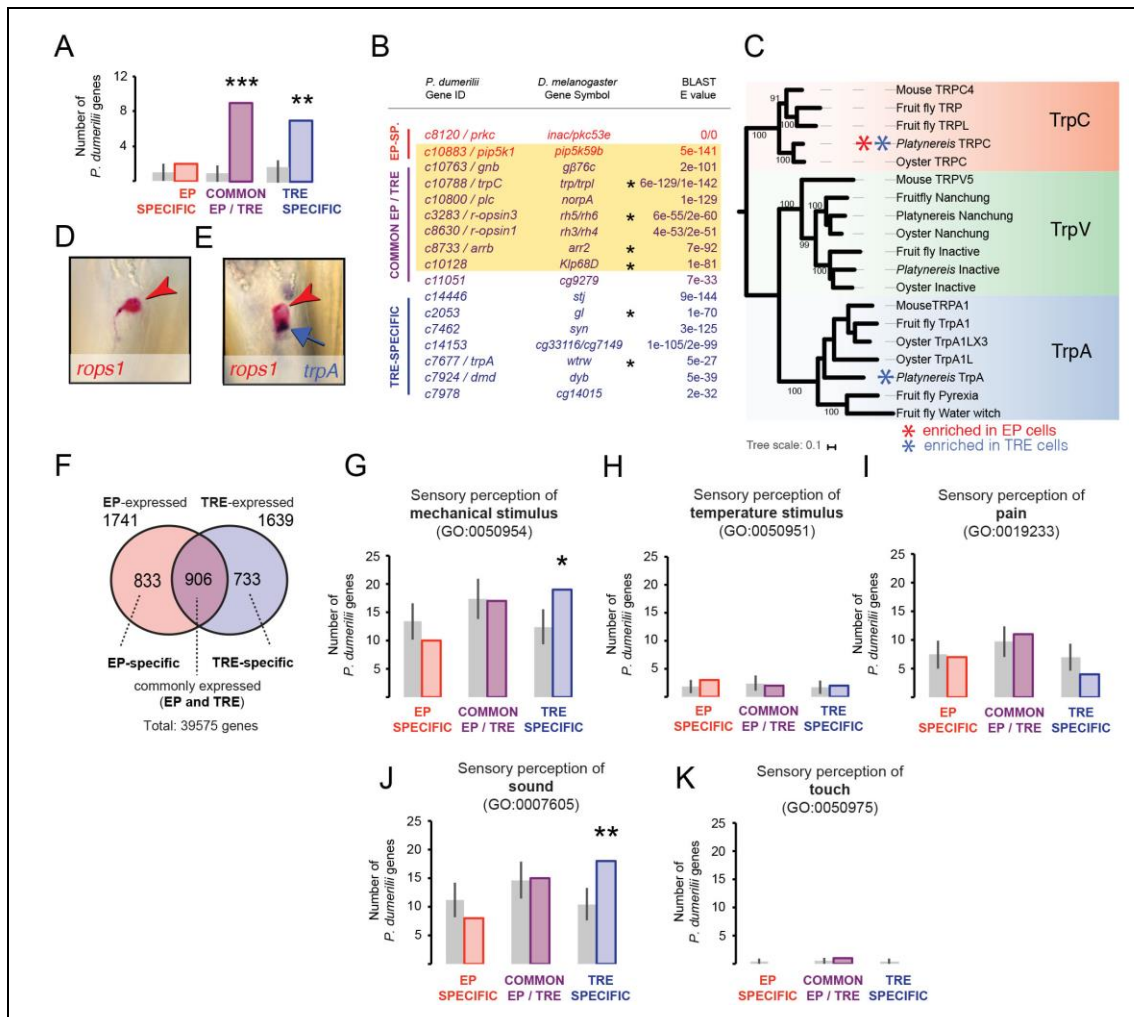

621 **Fig. 3. TRE cells also share a mechanosensory signature. (A,B)** Comparison of *P. dumerilii* EP- and  
622 TRE-enriched genes with *D. melanogaster* Johnston Organ (JO)-enriched genes. For comparison with  
623 *D. melanogaster* EP-enriched genes see [Fig.3- figure supplement 1](#). **(A)** Number of EP-specific (red),  
624 common EP- and TRE-enriched (purple) or TRE-specific (blue) *P. dumerilii* genes overlapping with *D.*  
625 *melanogaster* JO-enriched genes. Grey bars show the average number ( $\pm$  standard deviation) of TRE-  
626 specific, common EP- and TRE-enriched or TRE-specific *P. dumerilii* genes overlapping with randomly-  
627 selected sets of *D. melanogaster* genes. \*\*  $p < 0.01$ . \*\*\*  $p < 10^{-4}$ . **(B)** List of the overlapping genes  
628 indicated in (A). Each gene in the “*P. dumerilii* Gene ID” column indicates the best *P. dumerilii* Blast hit  
629 of the listed *D. melanogaster* gene. The yellow shading indicates genes that are part of the *D.*  
630 *melanogaster* phototransduction pathway. Asterisks indicate genes relevant for auditory JO function  
631 [15]. **(C)** Molecular phylogeny of Transient receptor potential channel (Trp) orthologs showing the  
632 assignment of the joint EP/TRE-enriched TRPC channel, and the *Platynereis* TrpA ortholog expressed  
633 in the TRE cells; **(D,E)** Specific co-expression of *Platynereis r-opsin1* (D,E, red; red arrowheads) and  
634 *trpA* (E, purple; blue arrow) in TRE cells, reflecting one of various TRE markers shared with  
635 mechanosensory cells (see [Fig.2- figure supplement 4,5](#)); caudal views, distal to the top. **(F)** Number  
636 of genes expressed in EP and/or TRE cells. **(G–K)** Number of EP-specific (red), common EP-/TRE-  
637 expressed (purple) or TRE-specific (blue) *P. dumerilii* genes overlapping with *Mus musculus* genes  
638 involved in sensory perception of mechanical stimulus (G), sensory perception of temperature stimulus  
639 (H), sensory perception of pain (I), sensory perception of sound (J), or sensory perception of touch (K).  
640 For list of overlapping genes indicated in (G) see [Fig.3- figure supplement 2](#). For list of overlapping

641 genes indicated in (J) see **Fig.3- figure supplement 2** (yellow shading). Grey bars show the average  
642 number ( $\pm$  standard deviation) of TRE-specific, common EP-/TRE-enriched or TRE-specific *P. dumerilii*  
643 genes overlapping with randomly-selected sets of *Mus musculus* genes. \*  $p < 0.05$ . \*\*  $p < 0.01$ .



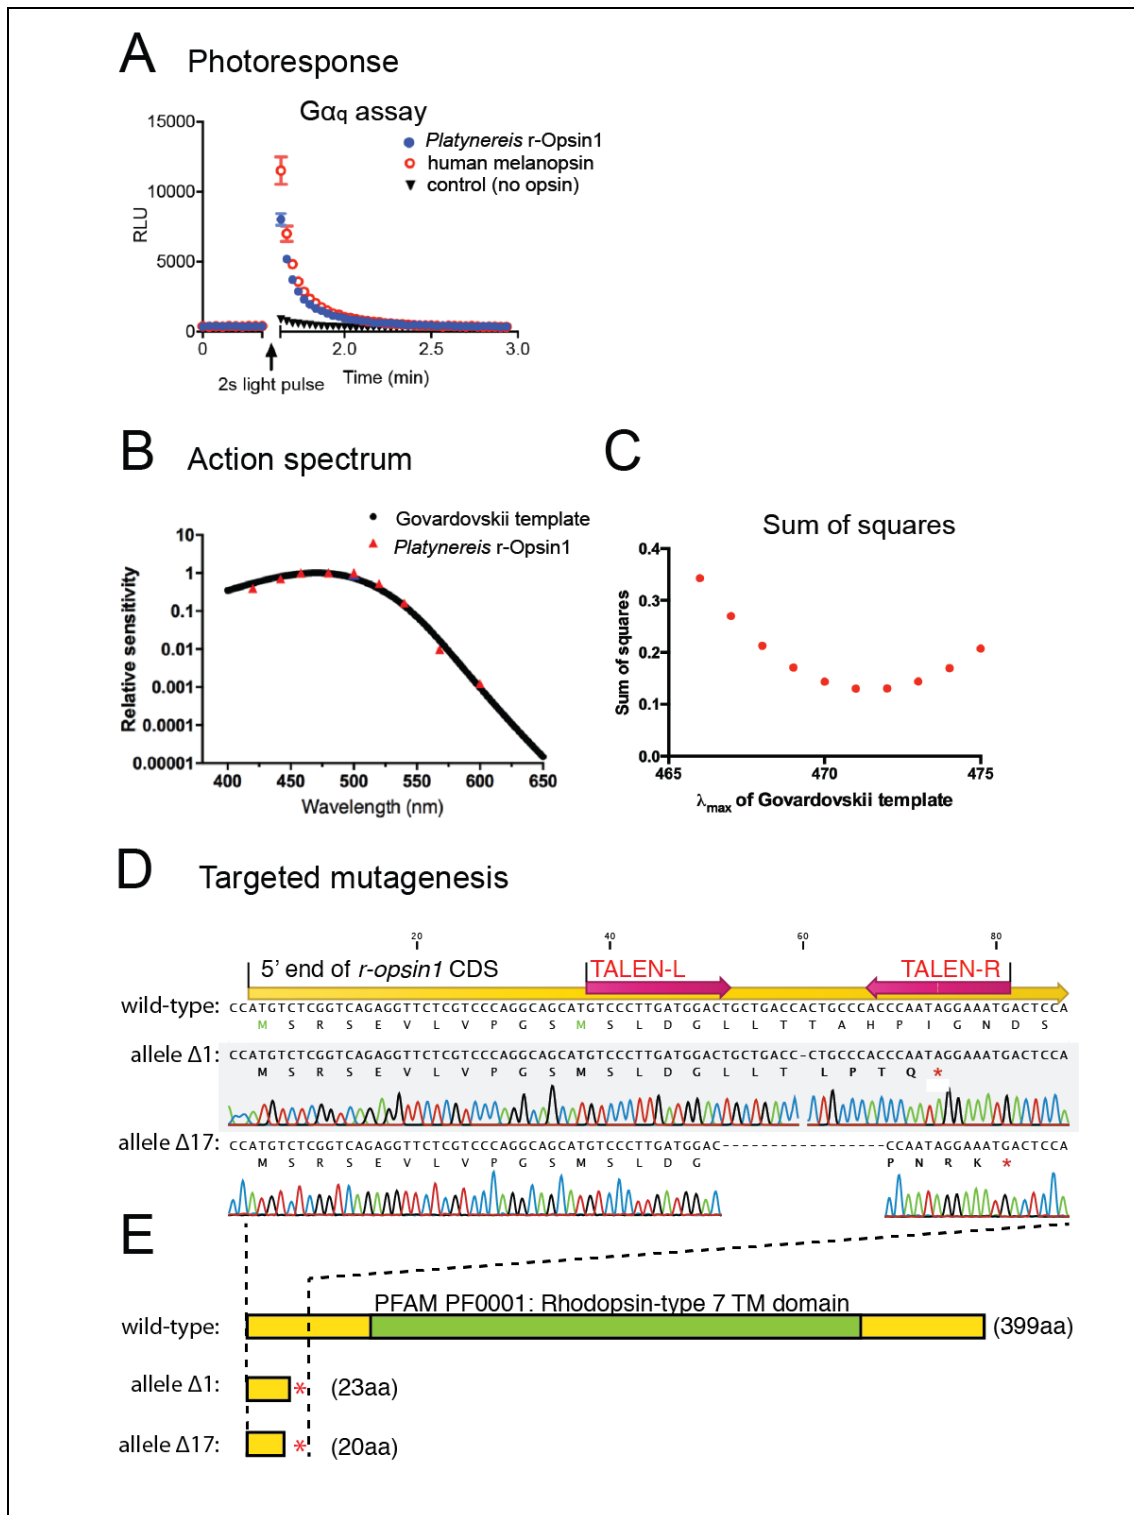

644 **Fig. 4. Action spectrum and targeted deletion of *Platynereis* r-Op sin1, a Gα<sub>q</sub>-coupled blue-light**  
 645 **photosensor. (A)** Gα<sub>q</sub> bioassay, showing an increase in luminescent reporter signal for calcium  
 646 increase after 2s white light exposure in cells transfected with *Platynereis* r-opsin1. The increase in  
 647 luminescent reporter signal is similar as when cells are transfected with the positive control human  
 648 melanopsin. n= 3 independent experiments in all cases. For Gα<sub>s</sub> and Gα<sub>i/o</sub> assays see [Fig.4- figure](#)  
 649 [supplement 1A,B](#). **(B)** Action spectrum of r-Op sin1 (based on light spectra and irradiance response  
 650 curves shown in [Fig.4- figure supplement 1C-F](#)), fit with a Govardovskii curve visual template obtained  
 651 with a  $\lambda_{\max}$  of 471 nm. **(C)** Plotted sum of squares between action spectra and Govardovskii templates at

652 varying  $\lambda_{\max}$ , revealing a minimum for  $\lambda_{\max}$  of 471 nm. **(D)** Targeted mutagenesis of *Platynereis r-opsin1*.  
653 Nucleotide alignment between the 5' ends of the wild-type (top) and mutant alleles for *r-opsin1*. In the  
654 wild-type sequence, positions of the coding sequence (yellow), and of the TALE nuclease binding sites  
655 (red arrows) are indicated. Allele  $\Delta 1$  contains a single nucleotide deletion, allele  $\Delta 17$  lacks seventeen  
656 nucleotides; both lead to premature stop codons (marked as red asterisks in the corresponding  
657 translations). **(E)** A comparison of the encoded proteins (protein lengths indicated in brackets) reveals  
658 that alleles  $\Delta 1$  and  $\Delta 17$  lack the complete 7-transmembrane domain (green, PFAM domain PF0001)  
659 including the critical lysine residue for retinal binding, strongly predicting the alleles as null alleles.

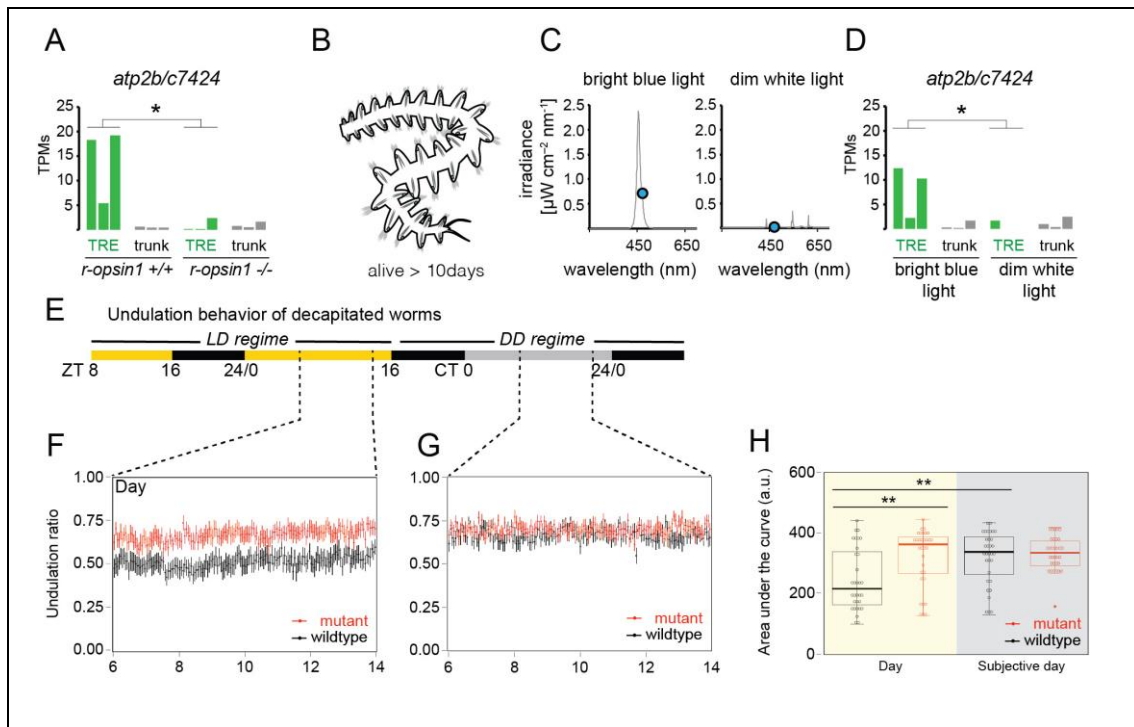

660 **Fig. 5. *r-opsin1* mediates blue-light modulation of TRE signature and undulation behavior.**  
661 **(A)** *atp2b/c7424* expression levels (in TPMs) in individual replicates of *r-opsin1*<sup>+/+</sup> and *r-opsin1*<sup>-/-</sup>  
662 worms cultured for 3-5 days in bright blue light. For *Atp2b2* phylogeny see [Fig.5- figure supplement 1](#).  
663 **(B)** Scheme of decapitated worm trunks as used in experiments C-H, that survive for up to 14days. **(C)**  
664 Spectral profile of bright blue and dim white light. The blue dot indicates the irradiance at 471 nm ( $\lambda_{max}$   
665 of *P. dumerilii* *r-opsin1*). **(D)** *atp2b/c7424* expression levels (in TPMs) in individual replicates of  
666 decapitated worms cultured for 3-5 days in bright blue light or dim white light. **(E-H)** Undulation behavior  
667 of decapitated worms. **(E)** Light regime. Black portions of the horizontal bar indicate “night” (light off),  
668 yellow portions indicate “day” (light on), and grey portions indicate “subjective day” (light off during “day”  
669 period). ZT: Zeitgeber Time. CT: Circadian Time. **(F, G)** Undulation ratio during “day” (F) and “subjective  
670 day” (G). Each black (red) point represents the mean of all wild-type (mutant) worms within a 3-minute  
671 window, and vertical bars represent the standard error of the mean (n=32 for each genotype, distributed  
672 among three independent experiments). For reliability tests of the algorithm used to detect undulation  
673 behavior see [Fig.5- figure supplement 3](#). **(H)** Area under the curve obtained from the undulation ratios  
674 shown in (F)(yellow background; “Day”) and (G)(grey background; “Subjective day”). Circles indicate  
675 data corresponding to individual worms. Box plots indicate the median (thick horizontal line), the 50%  
676 quantile (box) and 100% quantile (error bars). Filled circle indicates an outlier (as determined by the  
677 boxplot function of the ggplot R package). \* p-value < 0.05; \*\* p-value < 0.01 (Wilcoxon rank sum and  
678 signed rank tests). For behavioral responses to strong light of *r-opsin*<sup>+/+</sup> and *r-opsin*<sup>-/-</sup> trunks see [Fig.5-](#)  
679 [figure supplement 2](#).

680 Figure Supplements

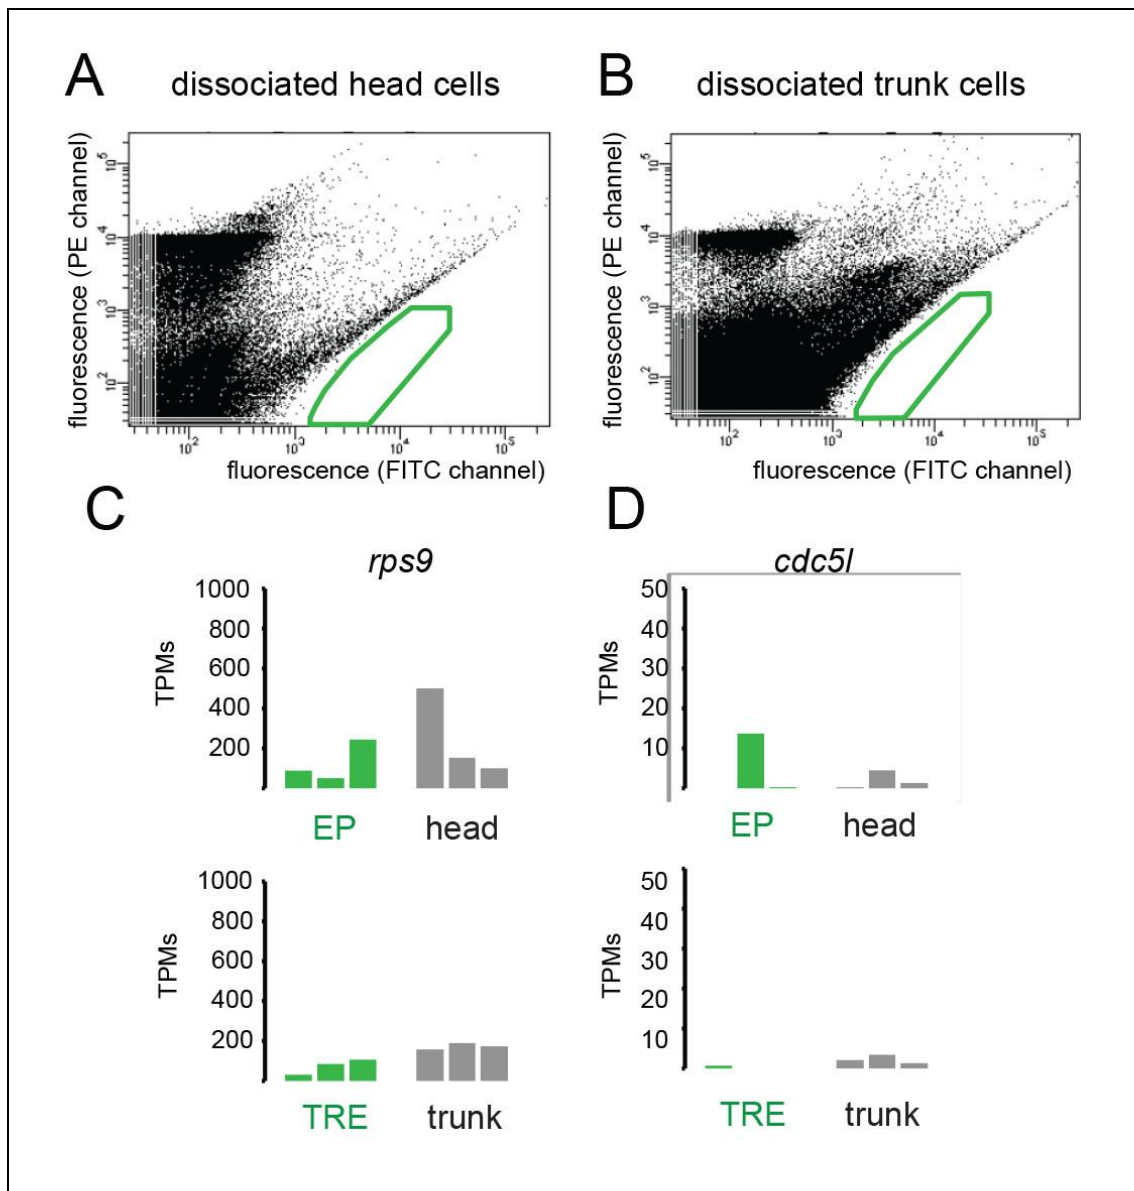

681 Fig.1- figure supplement 1. FACS profiles of dissociated cells from wild-type heads and trunks.  
682 (A) profile for wild-type head cells; (B) Profile for wild-type trunk cells. The areas boxed in green indicate  
683 gates chosen for the isolation of EGFP cells from transgenic pMos{rops::egfp}<sup>vbc12</sup> individuals. (C,D)  
684 Lack of enrichment of reference genes *rps9* and *cdc5-like* in head- and trunk-derived libraries.  
685 Comparison of transcripts per million reads (TPMs) for the genes *rps9* (A) and *cdc5-like/cdc5l* (B) in  
686 individual replicates of EP, head, TRE, and trunk libraries. (cf. Fig.1).

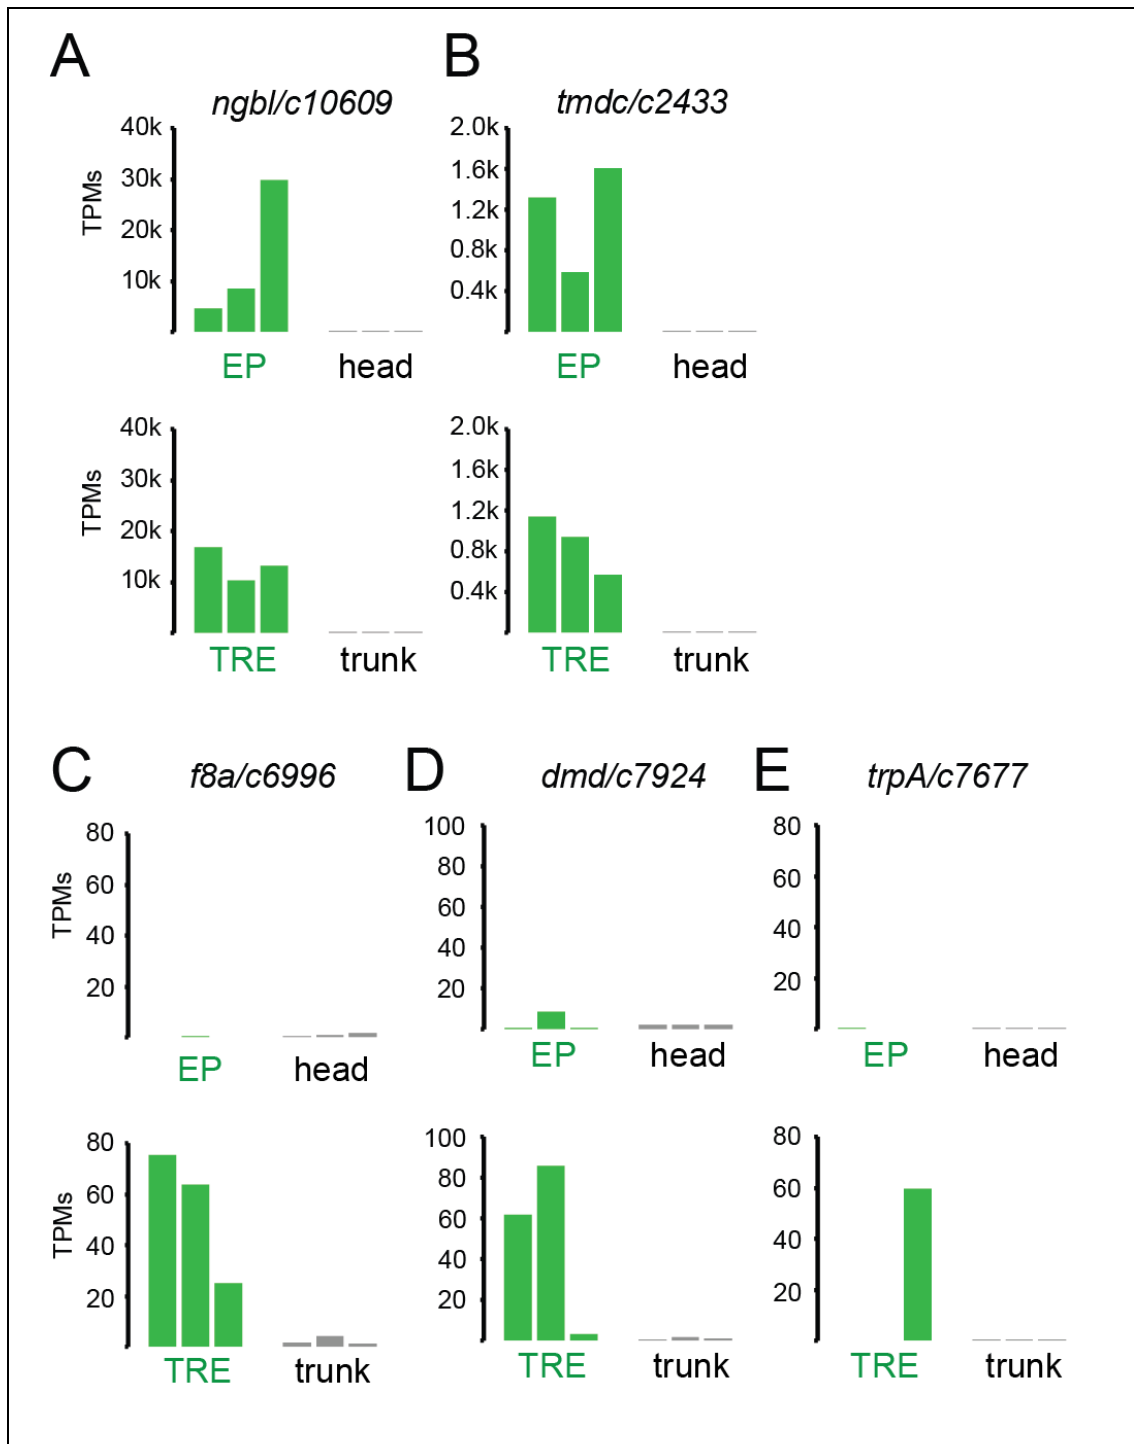

687 **Fig.2- figure supplement 1. Expression levels (in TPMs, in individual replicates) of enriched**  
688 **genes chosen for validation. (A,B)** Chosen genes enriched in both EP and TRE cells: *ngbl/c10609* (A)  
689 **and *tm/c2433* (B). (C,D,E)** Chosen genes specifically enriched in the TRE cells: *f8a/c6996* (C),  
690 ***dmd/c7924* (D) and *trpA/c7677* (E).**

691  
692  
693  
694  
695  
696

697

| <b>Gene/ID</b>        | <b>EP score</b>          | <b>TRE score</b>         | <b>Category</b> | <b>Data/validation</b>                             |
|-----------------------|--------------------------|--------------------------|-----------------|----------------------------------------------------|
| <i>r-opsin1/c8630</i> | <b>5x10<sup>-3</sup></b> | <b>8x10<sup>-4</sup></b> | common EP/TRE   | Fig. 1E, ref. [17]                                 |
| <i>egfp/c13611</i>    | <b>7x10<sup>-3</sup></b> | <b>4x10<sup>-3</sup></b> | common EP/TRE   | Fig. 1F, ref. [17]                                 |
| <i>gq/c6424</i>       | <b>0.018</b>             | <b>0.010</b>             | common EP/TRE   | Fig. 1G, ref. [17]                                 |
| <i>ngbl/c10609</i>    | <b>7x10<sup>-3</sup></b> | <b>7x10<sup>-3</sup></b> | common EP/TRE   | Fig. 2 – figure supplement 1A, 3E-H, 4B-C          |
| <i>tmdc/c2433</i>     | <b>7x10<sup>-3</sup></b> | <b>7x10<sup>-3</sup></b> | common EP/TRE   | Fig. 2 – figure supplement 1B, ref. [32]           |
| <i>f8a/c6996</i>      | -0.12                    | <b>0.019</b>             | TRE-specific    | Fig. 2 – figure supplement 1C, 3K-L, 4H-I          |
| <i>dmd/c7924</i>      | 0.70                     | <b>0.019</b>             | TRE-specific    | Fig. 2 – figure supplement 1D, 3M-N, 4J-K          |
| <i>trpA/c7677</i>     | -0.45                    | <b>0.038</b>             | TRE-specific    | Fig. 2 – figure supplement 1E, 3I-J, 4F-G, Fig. 3E |
| <i>rps9/c34148</i>    | -0.99                    | -0.64                    | not enriched    | Fig. 1 – figure supplement 1C                      |
| <i>cdc5/c20710</i>    | 0.61                     | -0.39                    | not enriched    | Fig. 1 – figure supplement 1D                      |

698

699

**Fig.2- figure supplement 2. Synopsis of validated genes identified in the transcriptome profiling.**

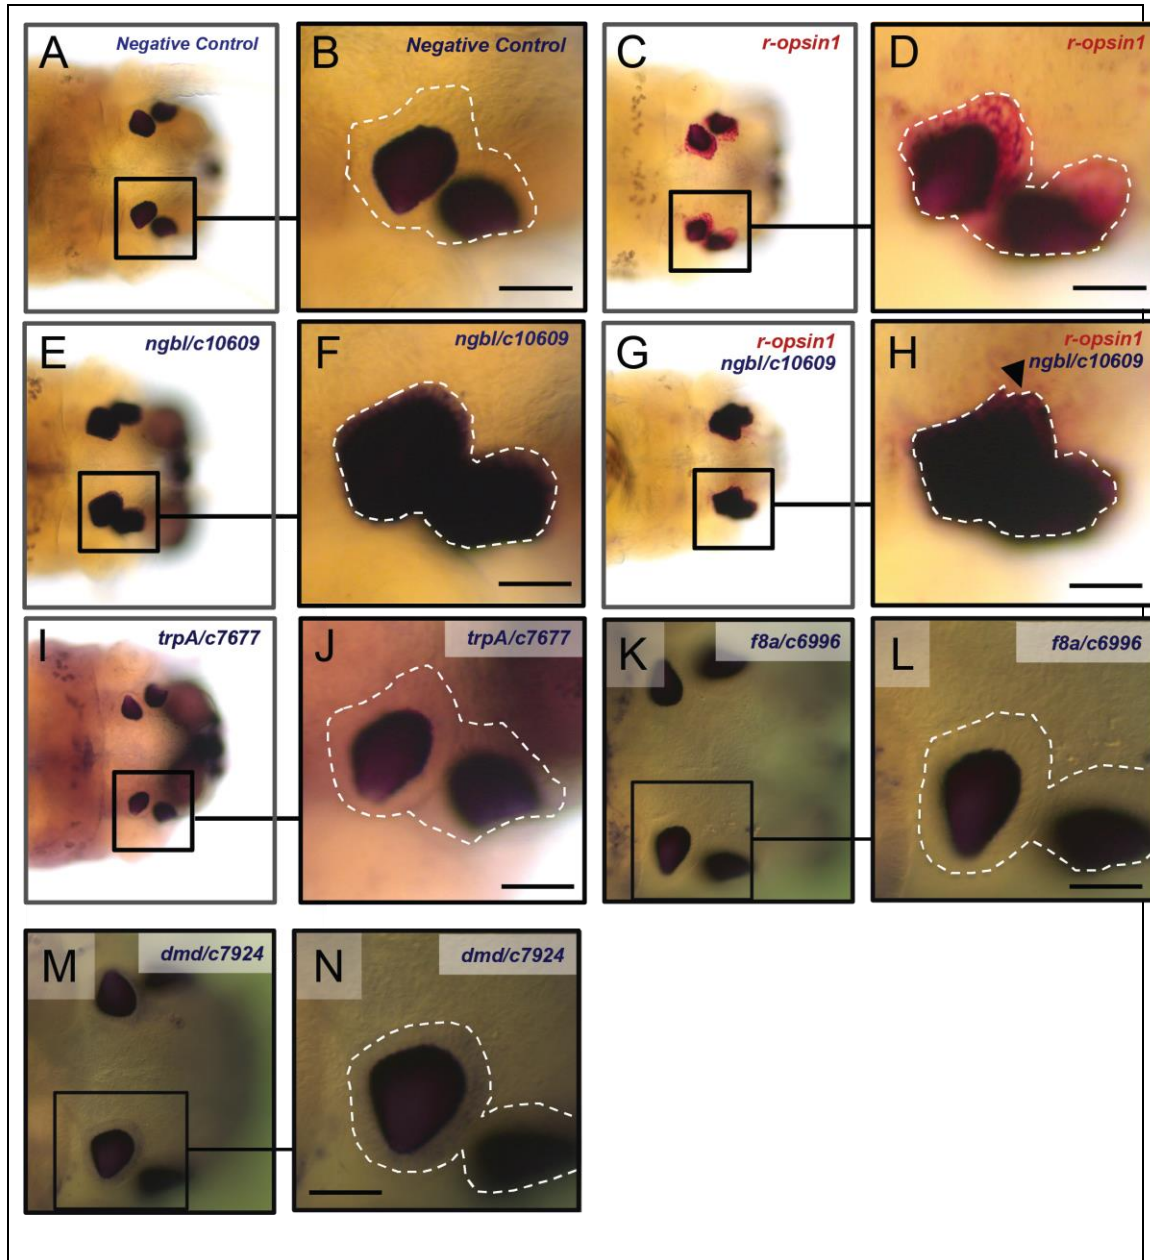

700 **Fig.2- figure supplement 3. Validation of selected genes from the differential enrichment analysis**  
701 **(head).** Low-magnification images (A,C,E,G,I,K,M) and high-magnification images (B,D,F,H,J,L,N) of  
702 single-color (A-F, I-N) or double-color (G,H) whole-mount in situ hybridization experiments using the  
703 following probes: A sense probe (A,B) showing no staining in the eyes; a probe against *r-opsin1*  
704 (C,D,G,H, red staining) showing expression in the eye photoreceptors; a probe against *ngbl/c10609*  
705 (E,F,G,H, blue staining) showing expression in the eyes that overlaps with the expression of *r-opsin1*  
706 (arrowhead in H); probes against *trpA/c7677* (I,J, blue staining), *f8a/c6996* (K,L, blue staining) and  
707 *dmd/c7924* (M,N, blue staining) showing no detectable expression in the eyes. The white broken line in  
708 B,D,F,H,J,L,N demarcates the region of the EP cells (see Supplementary Text). All scale bars: 50µm.

709

710

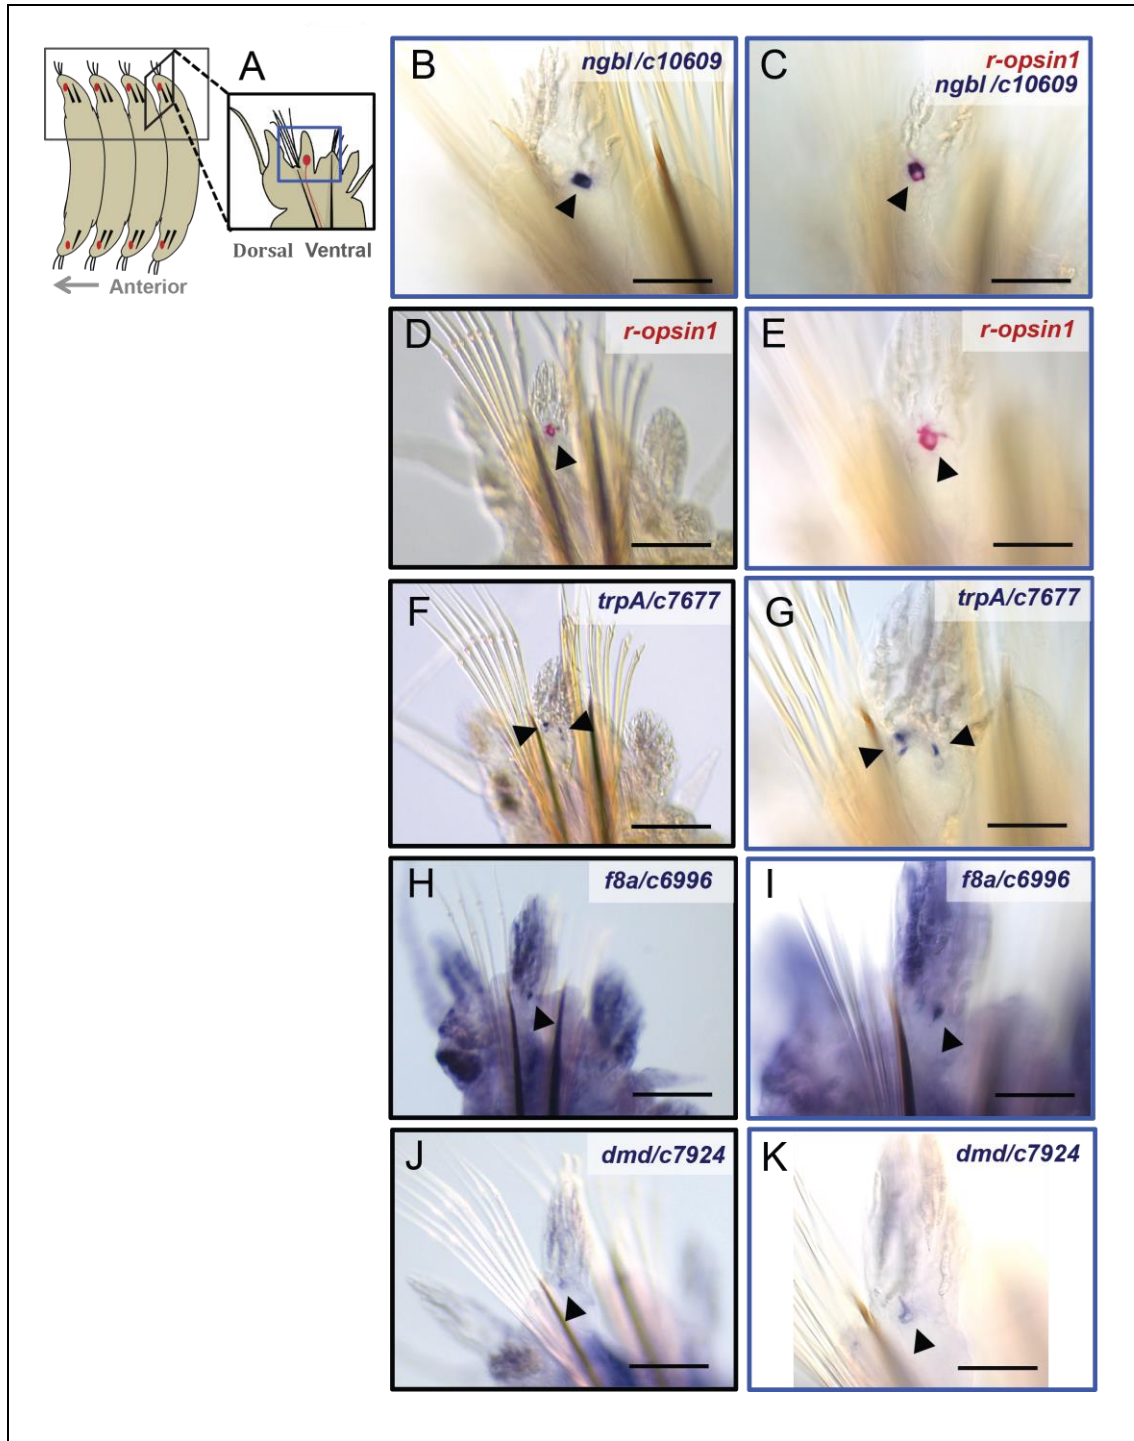

711 **Fig.2- figure supplement 4. Validation of selected genes of the differential enrichment analysis**  
712 **(trunk).** (A) Scheme showing the position of the TRE cells in the trunk. (B–K) Low magnification images  
713 (D,F,H,J) and high magnification images (B,C,E,G,I,K) of trunk WMISH (D-K) and double-WMISH (B,C)  
714 using the following probes: a probe against *r-opsin1* (C,D,E, red staining), showing expression in the  
715 TRE cell (arrowheads); a probe against *ngbl/c10609* (B,C, blue staining), showing expression in the  
716 TRE cell overlapping with the expression of *r-opsin1* (C); a probe against *trpA/c7677* (F,G, blue  
717 staining), showing expression in several spots (arrowheads) in the location of the TRE (Fig. 3D,E);  
718 probes against *f8a/c6996* (H,I, blue staining) and *dmd/c7924* (J,K, blue staining) showing expression  
719 in a single spot in a location consistent with the TRE cell. Scale bars in D,E,H,J: 100µm. Scale bars in  
720 B,C,E,G,I,K: 40µm.



721

| <b>Gene name</b> | <b>Gene ID</b> | <b>Genbank Accession</b> | <b>Gene symbol of homolog mentioned in this manuscript</b> |
|------------------|----------------|--------------------------|------------------------------------------------------------|
| <i>r-opsin1</i>  | <i>c8630</i>   | AJ316544.1               | NinaE/Rh3/Rh4 ( <i>D. melanogaster</i> )                   |
| <i>egfp</i>      | <i>c13611</i>  | LC336974.1               |                                                            |
| <i>gq</i>        | <i>c6424</i>   | KC109635.1               | Galphaq ( <i>D. melanogaster</i> )                         |
| <i>ngbl</i>      | <i>c10609</i>  | MT444158 [this study]    |                                                            |
| <i>tmdc</i>      | <i>c2433</i>   | MK330892                 |                                                            |
| <i>f8a</i>       | <i>c6996</i>   | MT444159 [this study]    |                                                            |
| <i>dmdl</i>      | <i>c7924</i>   | MT444160 [this study]    |                                                            |
| <i>trpA</i>      | <i>c7677</i>   | MT444161 [this study]    |                                                            |
| <i>rps9</i>      | <i>c34148</i>  | KF606862.1               |                                                            |
| <i>cdc5l</i>     | <i>c20710</i>  | GU322430.1               |                                                            |
| <i>r-opsin3</i>  | <i>c3283</i>   | KC810971.1               | Rh5/Rh6 ( <i>D. melanogaster</i> )                         |
| <i>gnb</i>       | <i>c10763</i>  | MT444162 [this study]    | Gbeta76C ( <i>D. melanogaster</i> )                        |
| <i>gngl</i>      | <i>c33855</i>  | MT444163 [this study]    | Ggamma30A ( <i>D. melanogaster</i> )                       |
| <i>plcb</i>      | <i>c10800</i>  | MT444164 [this study]    | NorpA ( <i>D. melanogaster</i> )                           |
| <i>prkc</i>      | <i>c8120</i>   | MT444165 [this study]    | InaC ( <i>D. melanogaster</i> )                            |
| <i>trpc</i>      | <i>c10788</i>  | MT444166 [this study]    | Trp/Trpl ( <i>D. melanogaster</i> )                        |
| <i>mpdzl</i>     | <i>c7982</i>   | MT444167 [this study]    | InaD ( <i>D. melanogaster</i> )                            |
| <i>calml</i>     | <i>c7432</i>   | MT444168 [this study]    | Cam ( <i>D. melanogaster</i> )                             |
| <i>myo3</i>      | <i>c14655</i>  | MT444169 [this study]    | NinaC ( <i>D. melanogaster</i> )                           |
| <i>tnikl</i>     | <i>c8565</i>   | MT444170 [this study]    |                                                            |
| <i>arrb</i>      | <i>c8733</i>   | MT444171 [this study]    | Arr2 ( <i>D. melanogaster</i> )                            |
| <i>pip5k1</i>    | <i>c10883</i>  | MT444172 [this study]    | PIP5K59B ( <i>D. melanogaster</i> )                        |
| <i>whrn</i>      | <i>c2513</i>   | MT444173 [this study]    | Whrn ( <i>M. musculus</i> )                                |
| <i>dnm</i>       | <i>c5186</i>   | MT444174 [this study]    | Dnm1 ( <i>M. musculus</i> )                                |
| <i>atp9l</i>     | <i>c10567</i>  | MT444175 [this study]    | Atp8b1 ( <i>M. musculus</i> )                              |
| <i>chrna9</i>    | <i>c11895</i>  | MT444176 [this study]    | Chrna9 ( <i>M. musculus</i> )                              |

|                 |               |                    |       |                                  |
|-----------------|---------------|--------------------|-------|----------------------------------|
| <i>tecta</i>    | <i>c20437</i> | MT444177<br>study] | [this | Tecta ( <i>M. musculus</i> )     |
| <i>soxc</i>     | <i>c4523</i>  | FN357282.1         |       | Sox2 ( <i>M. musculus</i> )      |
| <i>notch</i>    | <i>c10606</i> | MT444178<br>study] | [this | Jag2 ( <i>M. musculus</i> )      |
| <i>crym</i>     | <i>c23606</i> | MT444179<br>study] | [this | Crym ( <i>M. musculus</i> )      |
| <i>serpinbl</i> | <i>c28439</i> | MT444180<br>study] | [this | Serpinb6a ( <i>M. musculus</i> ) |
| <i>myh10l</i>   | <i>c6103</i>  | MT444181<br>study] | [this | Myh14 ( <i>M. musculus</i> )     |
| <i>atp2b</i>    | <i>c7424</i>  | MT444182<br>study] | [this | Atp2b2 ( <i>M. musculus</i> )    |

722  
723

Fig.2- figure supplement 5. Sequence identifiers of *Platynereis* genes analyzed in this study.

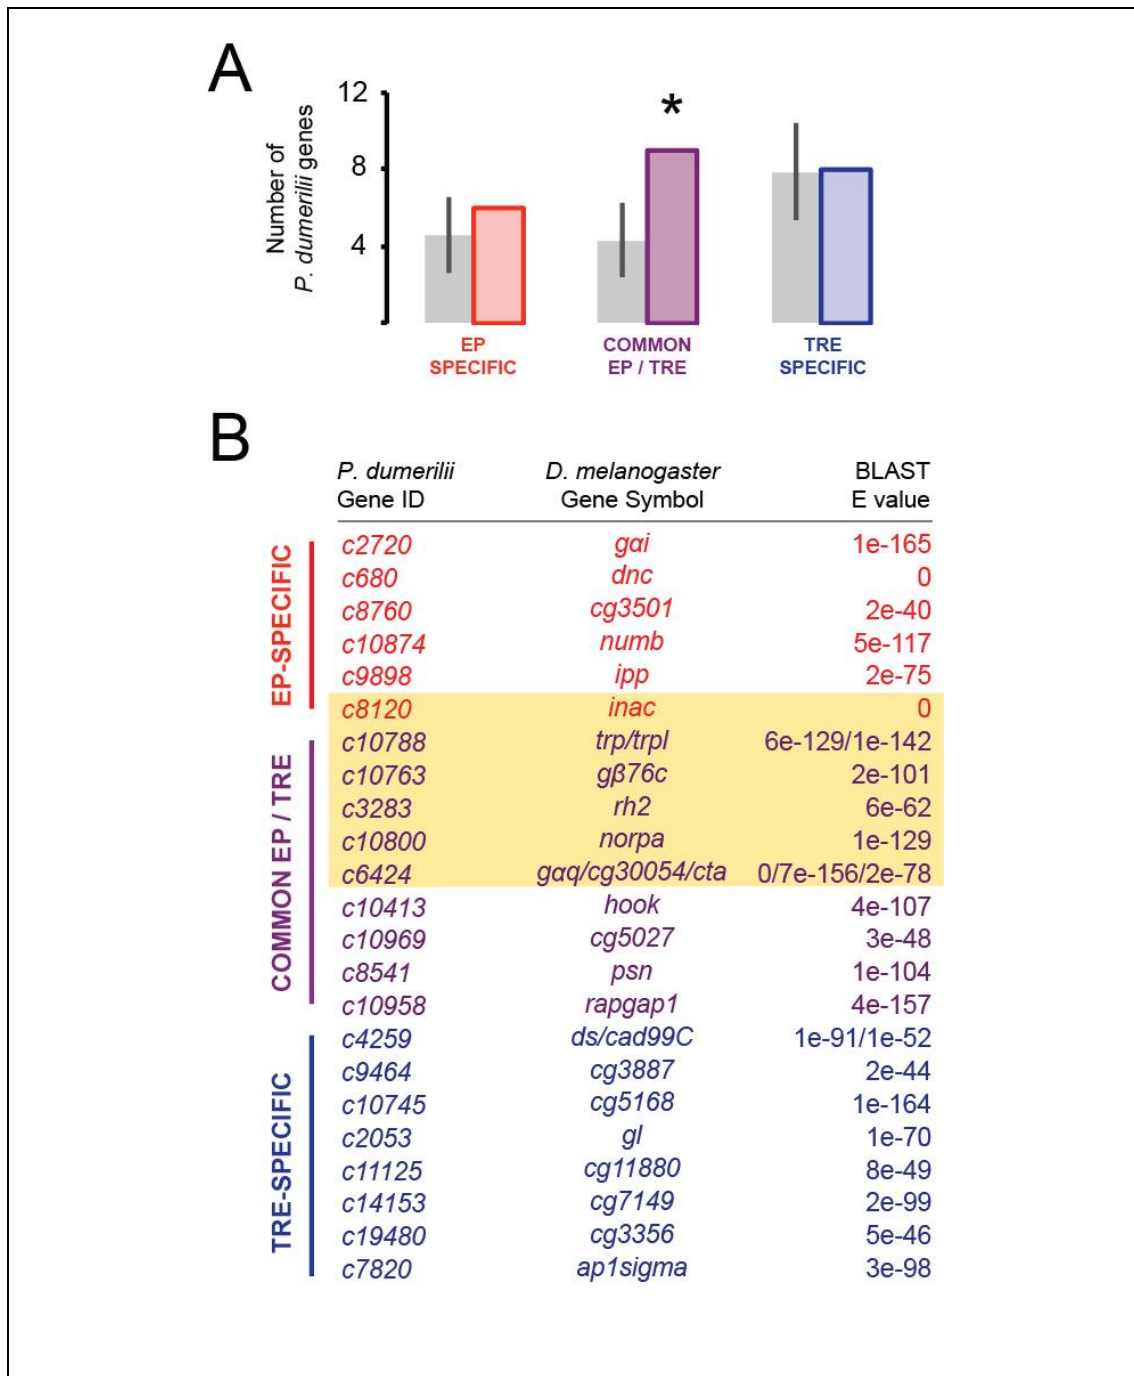

724

725

726 **Fig.3- figure supplement 1. Comparison of *P. dumerilii* EP- and TRE-enriched genes with *D.***

727 ***melanogaster* EP-enriched genes. (A)** Number of EP-specific (red), common EP- and TRE-enriched

728 (purple) or TRE-specific (blue) *P. dumerilii* genes overlapping with *D. melanogaster* EP-enriched genes.

729 Grey bars show the average number ( $\pm$  standard deviation) of TRE-specific, common EP- and TRE-

730 enriched or TRE-specific *P. dumerilii* genes overlapping with randomly-selected sets of *D. melanogaster*

731 genes. \*  $p < 0.05$ . (B) List of the overlapping genes indicated in (A). Best *P. dumerilii* Blast hits of the

732 corresponding *D. melanogaster* genes (middle column), as described in detail in Methods. The yellow

733 shading indicates genes that are part of the *D. melanogaster* phototransduction pathway.

734

|                        | <i>P. dumerilii</i><br>Gene ID | <i>M. musculus</i><br>Gene Symbol | BLAST<br>E value  |
|------------------------|--------------------------------|-----------------------------------|-------------------|
| <b>EP-SPECIFIC</b>     | c19864                         | Ano1                              | 4e-22             |
|                        | c6662                          | Grin2a/b/d                        | 2e-42/4e-44/3e-43 |
|                        | c11624                         | Cdh23/Pcdh15                      | 2e-157/2e-52      |
|                        | c1216                          | Chrna10                           | 2e-56             |
|                        | c15086                         | Lrig1                             | 1e-21             |
|                        | c29499                         | Tub                               | 6e-152            |
|                        | c36304                         | Slc12a2                           | 4e-41             |
|                        | c7424                          | Atp2b2                            | 0                 |
|                        | c10941                         | Gabbr2/3                          | 2e-74/1e-75       |
|                        | c7778                          | Atp6v1b1                          | 5e-108            |
| <b>COMMON EP / TRE</b> | c10559                         | Rab3a                             | 1e-121            |
|                        | c19136                         | Sod2                              | 1e-85             |
|                        | c10364                         | Wdr1                              | 7e-134            |
|                        | c10709                         | Tbl1x                             | 0                 |
|                        | c10848                         | Clic5                             | 6e-30             |
|                        | c10850                         | Sptbn4                            | 3e-98             |
|                        | c10955                         | Kcnma1                            | 0                 |
|                        | c1540                          | Map1a                             | 8e-83             |
|                        | c30248                         | Rpl38                             | 9e-24             |
|                        | c3250                          | Atp6v0a4                          | 0                 |
|                        | c34334                         | Homer2                            | 1e-91             |
|                        | c4259                          | Cdh1                              | 1e-21             |
|                        | c6138                          | Fgfr1/Fyn/Kit                     | 6e-54/0/1e-34     |
|                        | c6400                          | Casp3                             | 5e-70             |
|                        | c9994                          | Sod1                              | 7e-63             |
|                        | c8074                          | Myo7a/15/1a                       | 2e-148/3e-136/0   |
|                        | c13777                         | Myo6                              | 0                 |
| <b>TRE-SPECIFIC</b>    | c11426                         | Ntrk1                             | 2e-55             |
|                        | c11895                         | Chrna9                            | 1e-92             |
|                        | c23606                         | Crym                              | 4e-109            |
|                        | c2513                          | Whrn                              | 2e-22             |
|                        | c28439                         | Serpnb6a                          | 2e-70             |
|                        | c36224                         | Axin1                             | 9e-36             |
|                        | c4523                          | Sox2                              | 5e-33             |
|                        | c4683                          | Mkks                              | 3e-60             |
|                        | c5186                          | Dnm1                              | 0                 |
|                        | c6103                          | Myh14                             | 0                 |
|                        | c10567                         | Atp8b1                            | 1e-97             |
|                        | c10606                         | Jag2                              | 5e-70             |
|                        | c11252                         | Scn8a                             | 3e-137            |
|                        | c13113                         | Snai2                             | 1e-24             |
|                        | c14655                         | Myo3a                             | 0                 |
|                        | c20437                         | Tecta                             | 1e-38             |
|                        | c35565                         | Hoxa1                             | 1e-20             |
| c3629                  | Ush2a                          | 2e-34                             |                   |
| c7677                  | Trpa1/Espn                     | 8e-94/2e-26                       |                   |

735  
736  
737  
738  
739  
740  
741

**Fig.3- figure supplement 2. List of the overlapping genes indicated in Fig 3G.** Each gene in the “*P. dumerilii* Gene ID” column indicates the best *P. dumerilii* Blast hit to the corresponding *M. musculus* Gene Symbols in the middle column, as described in detail in Methods. The yellow shading indicates genes that are involved in the sensory perception of sound (Fig. 3J).

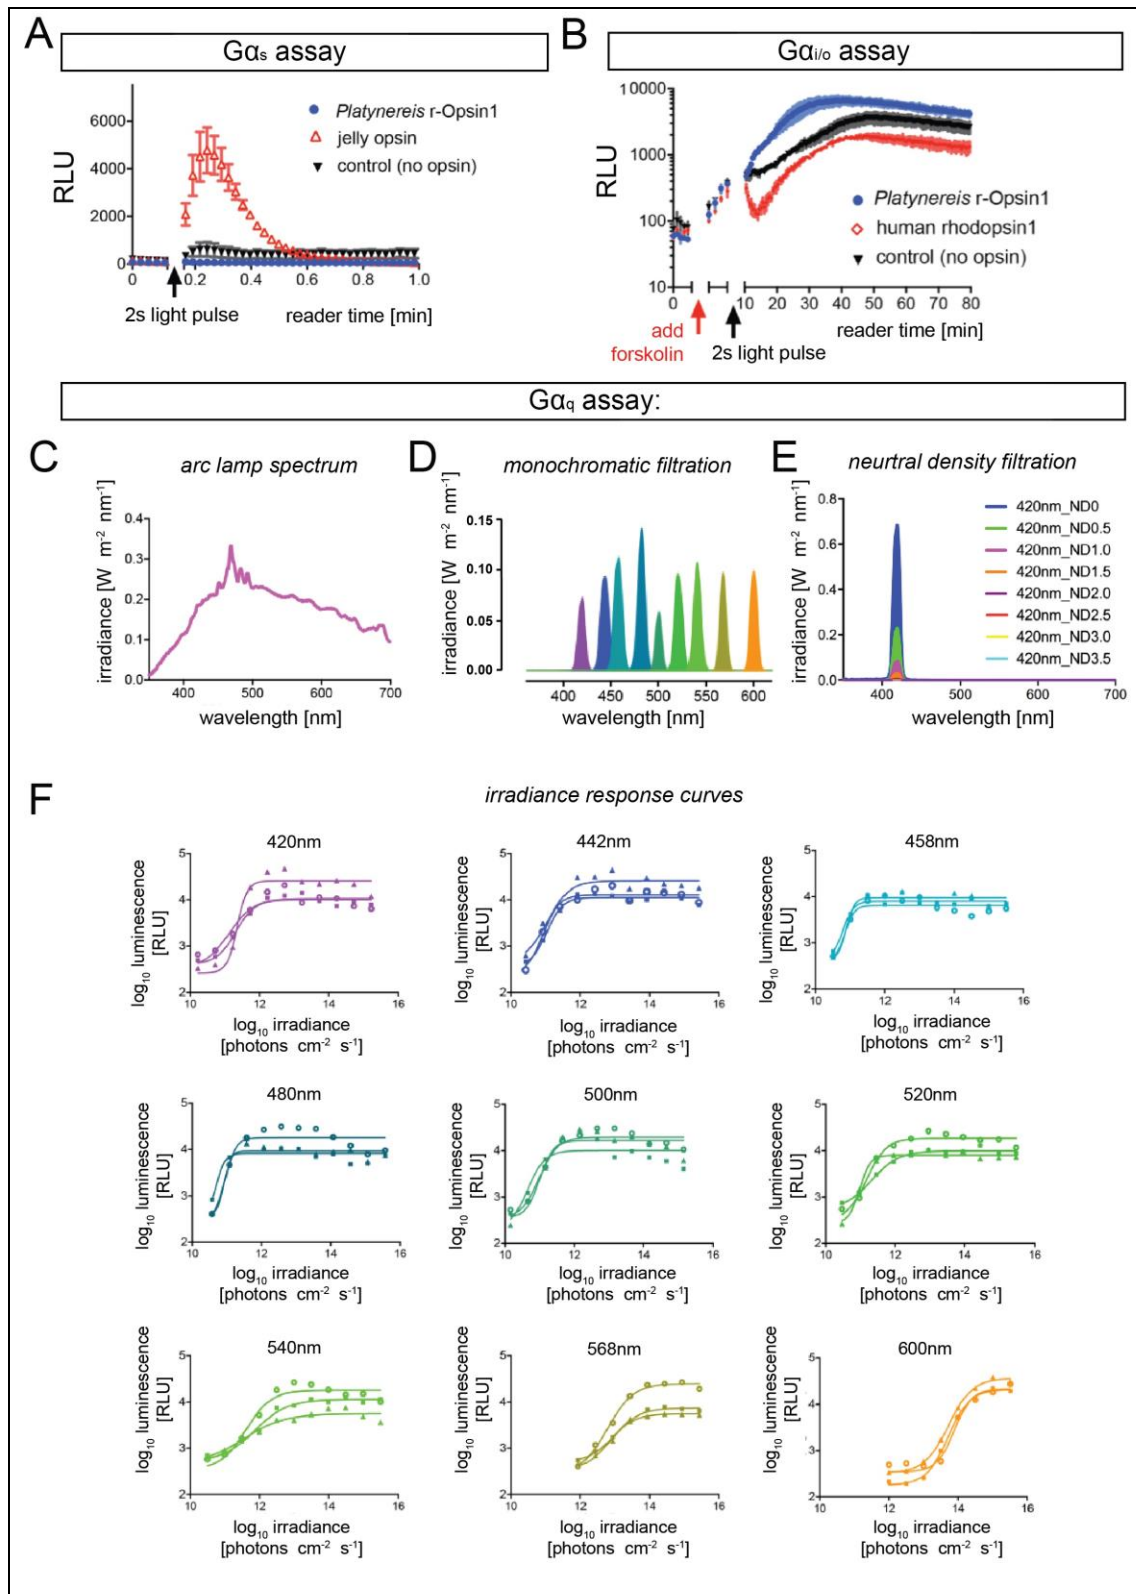

742

743

744

745

746

747

748

**Fig.4- figure supplement 1. Signaling properties of *Platynereis* r-Opisin1.** (A) In contrast to reporter cells transfected with a jellyfish *opsin* construct (red; ref. [53]), no detectable luminescence increase is observed after a 30s white light pulse in transfected with *P. dumerilii* r-opsin1 (blue), similar to non-transfected controls (black), indicating that *P. dumerilii* r-Opisin1 does not activate Gα<sub>s</sub>. (B) Similarly, while human *rhodopsin 1* transfection (red; ref. [53]) makes reporter cells susceptible to a 2s white light

749 pulse (reduction in cAMP concentration in cells pre-exposed to Forskolin), untransfected reporter cells  
750 (black) or cells transfected with *P. dumerilii* *r-opsin1* (blue) do not appear to activate  $G\alpha_{i/o}$  in *P. dumerilii*.  
751 In (A) and (B), x axes indicate plate reader time (interrupted by light exposure). Reporters were HEK293  
752 cells transfected with pcDNA5/FRT/TO Glo22F. **(C-F)** Light spectra and irradiance response curves for  
753 the  $G\alpha_q$  assay presented in **Fig. 4**. (C) Spectrum of the Arc lamp white light used for all G-protein  
754 selectivity assays. (D) Monochromatic light produced from the broad-spectrum Arc lamp light using  
755 bandpass filters. (E) Example (at 420nm) for the effect of neutral density filters on generating different  
756 irradiance levels for test in the irradiance response assays.(F) r-Opisn1 irradiance dose response  
757 curves for the  $G\alpha_q$  assay shown in **Fig. 4**; panels show the respective wavelength, and the  
758 luminescence responses correlated with tested irradiance levels. Respective luminescence values are  
759 plotted in relation to the baseline with minimal signal elicited with no light exposure (0% response – no  
760 light signal) and the maximum response evoked from that plate (100% response). Each irradiance  
761 response curve was fitted with sigmoidal dose response curve to derive the 50% maximal response  
762 used to calculate graphs represented in **Fig. 4B,C**.  
763 n= 3 independent experiments in all cases.

764

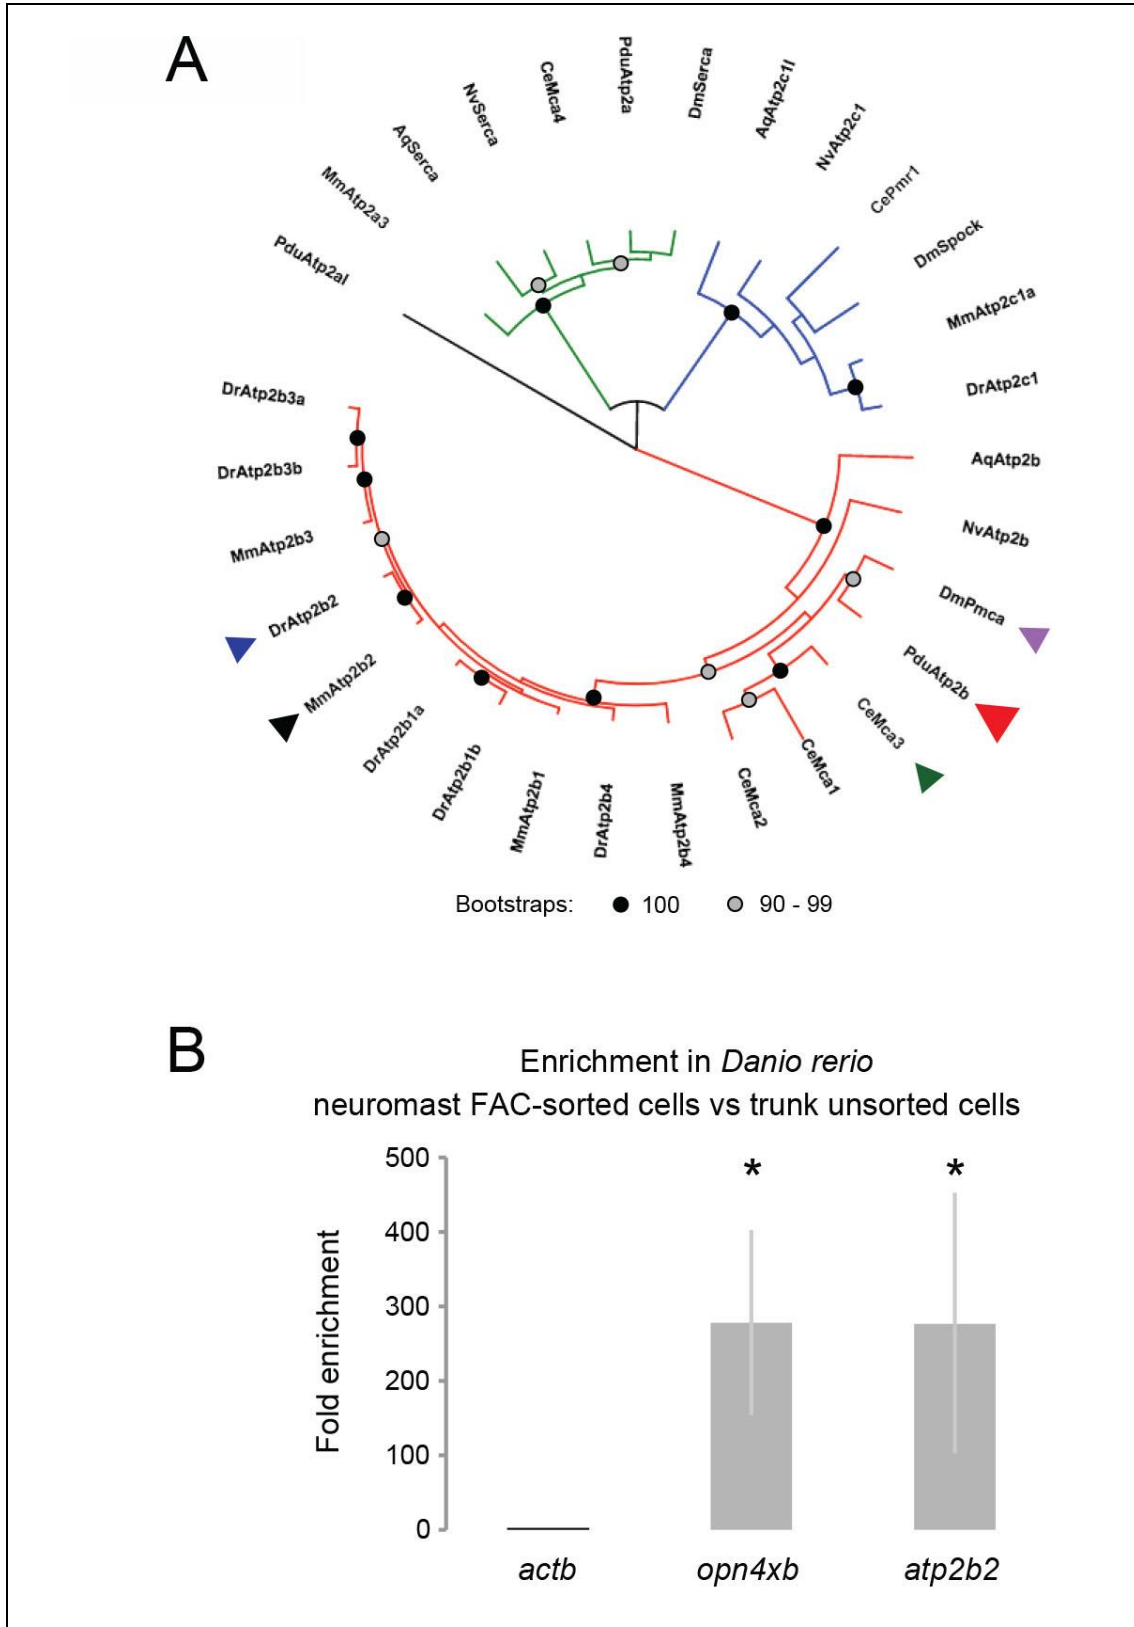

765

766 Fig.5- figure supplement 1. Atp2b2 phylogeny, and enrichment of *atp2b2* in zebrafish  
 767 neuromasts. (A) Phylogenetic tree including Atp2b2 and related genes. Mm: *Mus musculus*; Dr: *Danio*  
 768 *rerio*; Dm: *Drosophila melanogaster*; Ce: *Caenorhabditis elegans*; Pdu: *Platynereis dumerilii*; Nv:  
 769 *Nematostella vectensis*; Aq: *Amphimedon queenslandica*. Red clade: Atp2b protein family; Green clade:

770 Atp2a protein family; Blue clade: Atp2c protein family. Arrowheads indicate proteins encoded by genes  
771 mentioned in the manuscript: Black: Mouse Atp2b2; Dark blue: zebrafish Atp2b2; Light blue: Drosophila  
772 Pmca; Green: *C. elegans* Mca-3; Red: *Platynereis* Atp2b. **(B)** Bar plots indicate fold enrichment of *actb*,  
773 *opn4xb* and *atp2b2* mRNA expression (measured by quantitative PCR) in neuromast cells (FAC-sorted  
774 from fish trunks) as compared to unsorted cells from the same fish trunks. Enrichment values were  
775 normalized to *actb* levels. As *opn4xb* (previously known as *opn4x2*) has been shown to be specifically  
776 expressed in the neuromasts of the lateral line within the trunk of the fish [17], the enrichment of  
777 *opn4xb*, confirms the correct isolation of neuromasts cells. \* p-value < 0.05 (Student's t-test).



778

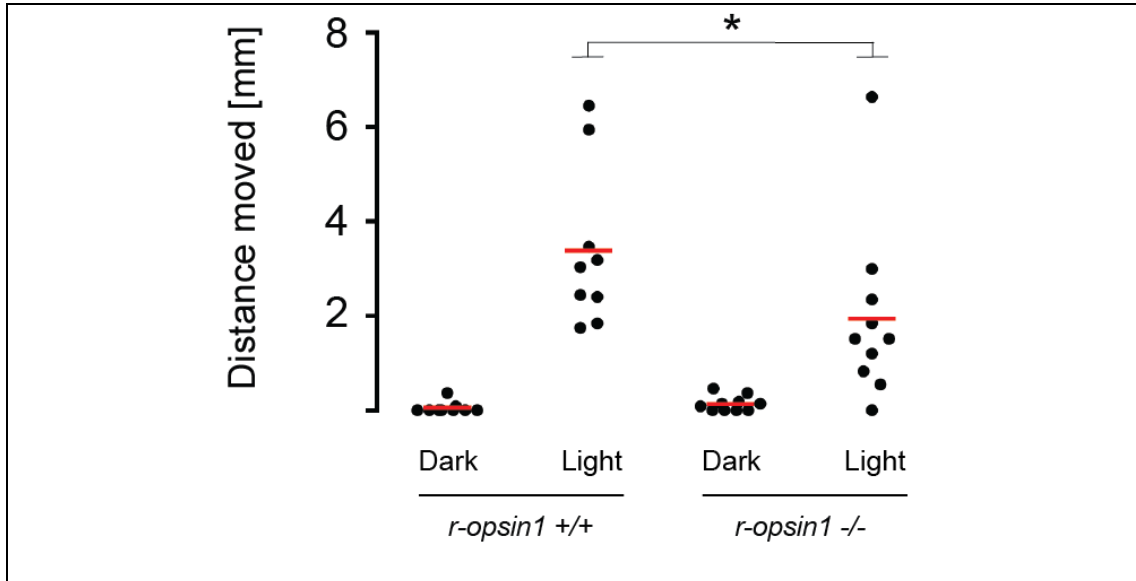

779

780 **Fig.5- figure supplement 2. Net avoidance crawling distance of decapitated *r-opsin+/+* and *r-***  
781 ***opsin-/-* worms in response to strong light.** Dot plot showing the distance moved (in mm) by worms  
782 exposed to a bright light pulse ("Light") or not exposed ("Dark"). \* p-value < 0.05 (Wilcoxon rank sum  
783 test).

784

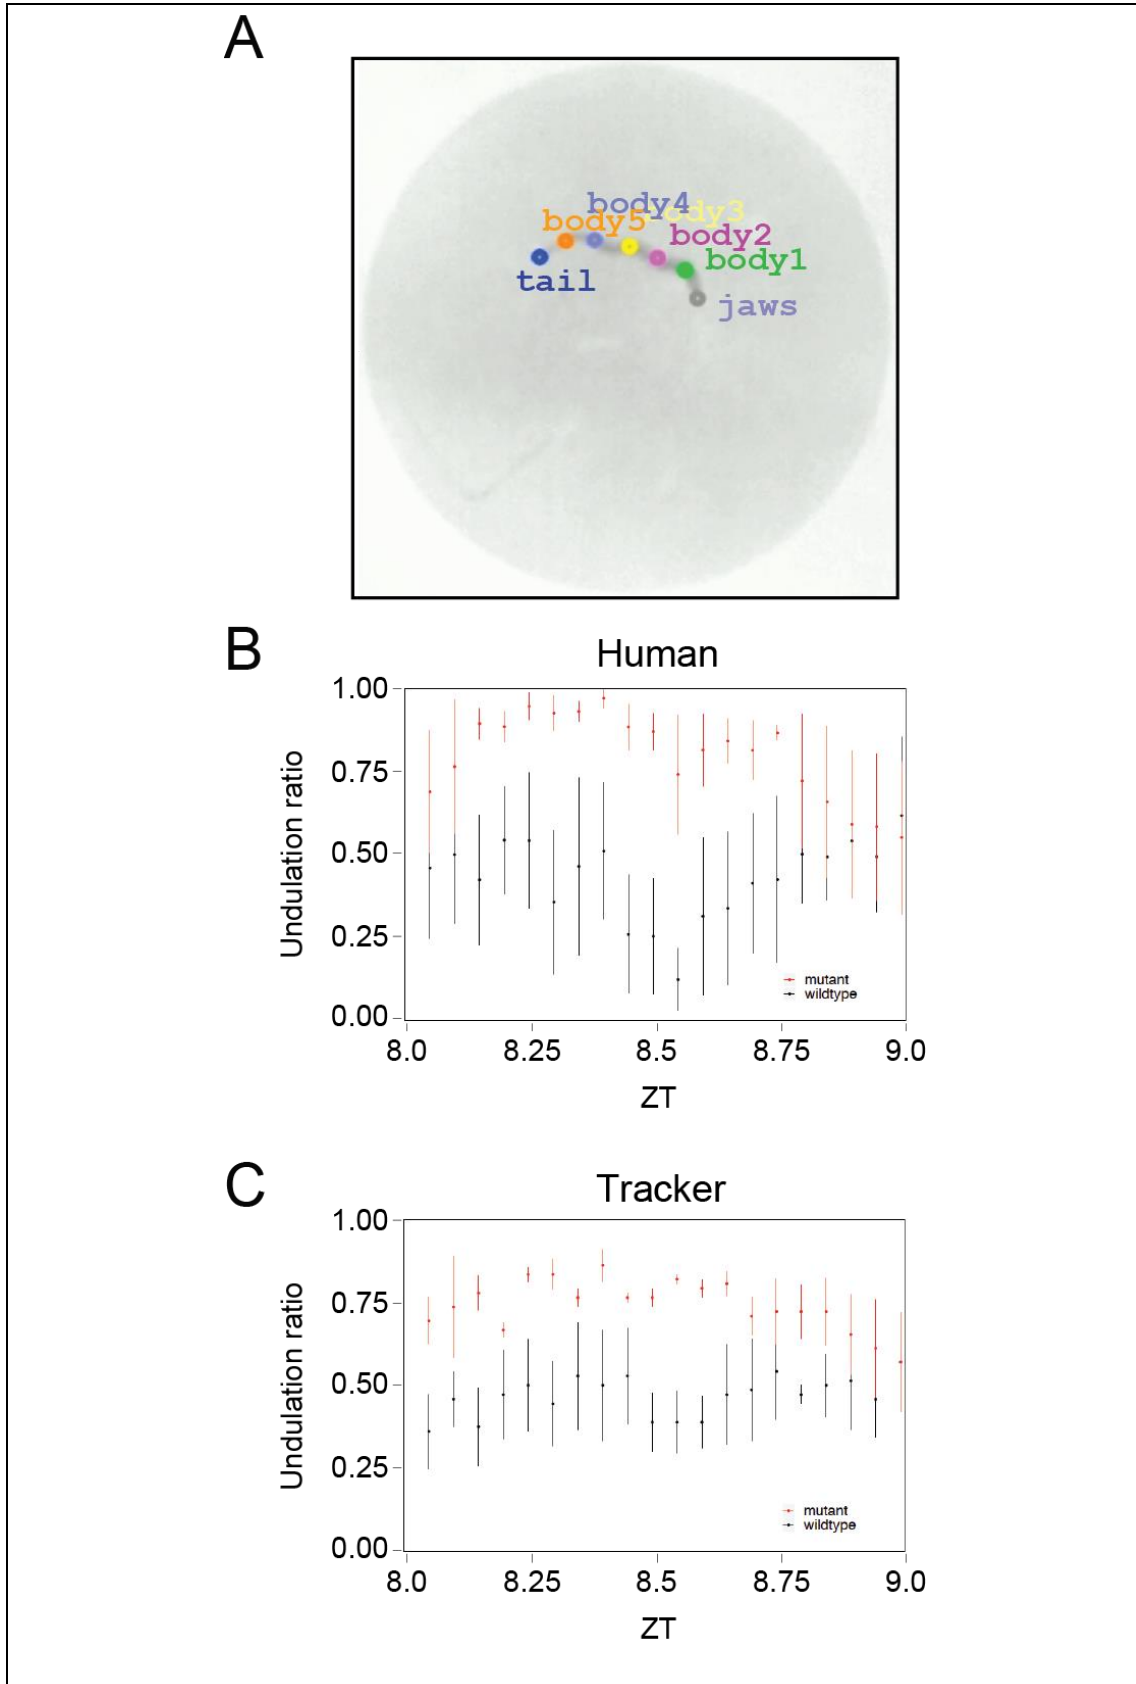

785

786

787

788

**Fig.5- figure supplement 3. Benchmarking the algorithm used to detect undulation behavior. (A)** Behavior arena of an individual worm showing the key points detected by the automatized tracker along

789 the worm: jaws (“jaws”), 5 points along the trunk (“body1-5”) and tail (“tail”). **(B,C)** Undulation ratio of  
790 wild-type (black) and mutant (red) worms as determined by a human observer (B) or by the automatized  
791 tracker (C). Each point represents the mean of all wild-type or mutant worms within a 3-minute window,  
792 and vertical bars represent the standard error of the mean (n=4 for each genotype).

## 793 METHODS

### 794 **Animal culture and handling**

795 All animal research and husbandry was conducted according to Austrian and  
796 European guidelines for animal research (fish maintenance and care  
797 approved under: BMWFW-66.006/0012-WF/II/3b/2014, experiments approved  
798 under: BMWFW-66.006/0003-WF/V/3b/2016, which is cross-checked by:  
799 Geschäftsstelle der Kommission für Tierversuchsangelegenheiten gemäß §  
800 36 TVG 2012 p. A. Veterinärmedizinische Universität Wien, A-1210 Wien,  
801 Veterinärplatz 1, Austria, before being issued by the BMWFW). Zebrafish  
802 were kept in a constant recirculating system at 26-28°C in a 16h light / 8h  
803 dark cycle. Collected embryos were kept at 28°C until hatching.

804 *Platynereis dumerilii* were raised and bred in the Max Perutz Labs marine  
805 facility according to established procedures [76]. Experimental animals were  
806 immature adults fed last 4 to 6 days prior to the day of the experiment.  
807 Remaining food was removed a day after feeding, and the seawater changed,  
808 leaving the worms unperturbed for 3 to 5 days prior to sampling. All  
809 pMos{rops::egfp}<sup>vbc12</sup> transgenic worms [17] used for transcriptome profiling  
810 were screened for strong EGFP fluorescence under a stereo microscope  
811 system (Zeiss SteREO Lumar V12) at least 6 days before the experiment. To  
812 partially immobilize the worms for the screening, worms were shortly  
813 transferred to a dry petri dish.

### 814 **Fluorescence-Activated Cell (FAC) Sorting**

815 EGFP-positive cells from 1–2 worms were isolated by FAC sorting with three  
816 biological replicates. For the head and trunk of each replica, a sample of  
817 unsorted cells was also isolated as reference.

818 To FAC-sort EGFP+ cells, 1–2 immature transgenic worms per biological  
819 replicate were decapitated under a stereoscopic microscope (Zeiss Stemi  
820 2000; Zeiss, Germany) by using a sterile scalpel (Schreiber Instrumente #22;  
821 Schreiber Instrumente GmbH, Germany). Separated heads or trunks were  
822 placed on ice for about 2 min in 2ml seawater immediately before  
823 dissociation. Heads were mechanically dissociated through a nylon 70µm cell-  
824 strainer (Falcon, USA) in 600µl seawater. Trunks were first cut into 3-4 pieces  
825 using a sterile scalpel, and then dissociated in the same way, using 3ml

826 seawater. Cell suspensions were passed four times through 35µm nylon  
827 mesh cell-strainers (5ml Polystyrene round-bottom tube with cell-strainer cap,  
828 Art. #352235, Falcon), and placed on ice. Finally, the volume of the single-cell  
829 suspensions was adjusted to 600µl (for heads) or 3ml (for trunks) with ice-  
830 cold seawater. Heads and trunks from 1-2 non-transgenic worms were also  
831 dissociated as negative controls for the detection of EGFP fluorescence.  
832 Cell suspensions were stained with Propidium Iodide (PI; ThermoFisher  
833 Scientific, P1304MP) by adding 8µl of 1.5mg/ml PI per ml of cell suspension,  
834 and were kept on ice until FAC-sorted. Stained cell suspensions were  
835 analyzed on a FACSAria Illu FAC Sorter (BD Bio-sciences). FAC-sorting  
836 (FACS) events were first gated to exclude aggregates using the FSC-A and  
837 FSC-W channels. To separate real EGFP fluorescence from  
838 autofluorescence, we followed a previously established strategy [77],  
839 measuring fluorescence elicited by a 488nm laser using two distinct detectors  
840 (see **Fig. 1C,D**). One quantified fluorescence in the 515-545nm range (“FITC”  
841 axis in **Fig. 1C,D**; **Fig.1- figure supplement 1A,B**), while the other quantified  
842 fluorescence in the 600-620nm range (“PE” axis in **Fig. 1C,D**; **Fig.1- figure**  
843 **supplement 1A,B**). Comparison between stained cell suspensions from  
844 transgenic (**Fig. 1C,D**) and wild-type (**Fig.1- figure supplement 1A,B**)  
845 specimens allowed for the definition of the gate containing EGFP+ events  
846 (boxes in **Fig. 1C,D**).

#### 847 **Transcriptome profiling of EGFP+ cells**

848 Aliquots of 30 – 120 FACS events from the EGFP+ gate of transgenic heads  
849 or trunks were sorted into wells of a 96-well plate (Hard-Shell Low-Profile  
850 Thin-Wall 96-Well skirted PCR plate, Bio-Rad HSP-9631) containing 4µl of  
851 lysis buffer. The lysis buffer consisted of 3.8µl of 0.2% (vol/vol) Triton X-100  
852 (20µl Triton X-100 BioXtra, Sigma T9284 in 10ml Nuclease-free H<sub>2</sub>O) + 0.2µl  
853 RNase Inhibitor (Clontech 2313A). Loading of the plate was carried out under  
854 a laminar flow hood to avoid contamination, and according to the  
855 recommended procedures for subsequent isolation of RNA and synthesis of  
856 cDNA using the Smart-Seq2 technology [25]. The 96-well plate containing  
857 lysis buffer was kept on ice until loaded onto the FAC-sorting machine. The  
858 96-well plate was maintained at 4°C during the FAC-sorting procedure.

859 A sample of unsorted cells was also taken from the same cell suspension  
860 from which the FAC-sorted cells were isolated. For this, immediately prior to  
861 FAC-sorting, 0.4  $\mu$ l of the cell suspension was pipetted into 4 $\mu$ l lysis buffer  
862 onto the same 96-well plate used for the sorted cells. From then on, the  
863 lysates with FAC-sorted cells and the lysates with unsorted cells were  
864 subjected to the same procedures. Immediately after sorting, the 96-well plate  
865 containing the lysates was sealed (AlumaSeal CS Films for cold storage,  
866 Sigma-Aldrich Z722642-50EA) and stored at -80°C.

## 867 **Bioinformatic Analyses**

868 **Transcriptome assembly.** All sequencing reads from head or trunk FAC-  
869 sorted and unsorted samples from transgenic worms were used to assemble  
870 a *de novo* *Platynereis dumerilii* transcriptome, using the Trinity Software  
871 version 2.0.6 [78]. Transcripts were filtered for a minimum length of 250 bp.  
872 Also, all transcripts that contained overlapping sequences of 50 bp or longer  
873 were grouped into clusters. This ensured that each sequencing read (50bp)  
874 could be unambiguously mapped onto a single cluster. For each cluster, we  
875 computed nominal transcript length by concatenating the unique sequences  
876 within the cluster.

877 **Mapping reads to transcriptome.** Sequencing reads from each individual  
878 sample were mapped onto the *de novo* transcriptome using the NextGenMap  
879 program [79]. Reads that could be mapped onto more than one transcript  
880 within the same cluster were mapped only onto one of the transcripts. The  
881 number of reads mapped onto each transcript were counted, and counts onto  
882 the transcripts within each cluster were added to obtain the total number of  
883 reads per cluster. As different transcripts within each cluster likely reflect  
884 polymorphisms and splice variants, we refer to these clusters as “genes”.  
885 Gene contigs corresponding to spiked-in sequences (obtained by blast  
886 against ERCC92 sequences) were removed to obtain the list of *P. dumerilii*  
887 genes.

888 **Determining gene expression levels.** To obtain normalized expression  
889 levels for each gene, we computed the number of transcripts per million reads  
890 (TPMs) as follows: 1. We assigned a nominal transcript length to each gene  
891 by concatenating the longest transcript within the cluster with all the non-

892 overlapping sequences of the rest of the transcripts of the cluster; 2. For each  
893 gene, we normalized the read counts to the associated transcript length (in  
894 kilo base pairs); 3. For each sample, we normalized to the total million reads  
895 in the sample. Genes were considered to be expressed in any given sample if  
896 they showed  $\geq 12$  TPMs in at least one biological replicate. This threshold is  
897 consistent with our enrichment analysis (see below), since it is approximately  
898 the minimum expression level required for a gene to be significantly enriched  
899 in our differential expression analysis. A gene was considered to be  
900 expressed specifically in EP (or TRE) cells if it was expressed in EP (or TRE)  
901 cells, and not in TRE (or EP) cells.

902 **Differentially expressed genes.** To identify differentially expressed genes,  
903 we used the EdgeR software package, according to the developers'  
904 instructions [27,80]. For each experiment, we used the raw read counts to first  
905 filter out all genes that did not have more than 1 count per million in at least 3  
906 samples within the experiment, and to then calculate normalization factors for  
907 each sample by comparing all samples of the same experiment.  
908 Subsequently, we used the quantile-adjusted conditional maximum likelihood  
909 (qCML) method to calculate the common and gene-wise dispersion, and the  
910 exact test for the negative binomial distribution to test for differentially  
911 expressed genes [27,80]. Only genes with an FDR  $\leq 0.05$  were considered  
912 significantly differentially expressed. Genes were considered significantly  
913 enriched in EP (or TRE) cells of the head (or the trunk) if they fulfilled the  
914 following two criteria: (i) They were identified as differentially expressed  
915 between EP (or TRE) cells of the head (or the trunk) and unsorted cells of  
916 both head and trunk; (ii) their expression in EP (or TRE) cells of the head (or  
917 the trunk) was higher than in unsorted cells of the head and the trunk. Genes  
918 were considered specifically enriched in the EP (or TRE) cells of the head (or  
919 the trunk), if they were enriched in the EP (or TRE) cells of the head (or the  
920 trunk), and not enriched in the TRE (or EP) cells of the head (or the trunk).  
921 Two genes (c8629 and c14134) were excluded from further analyses because  
922 they represent redundant fragments of the *ropsin1* gene.

923 **Detection of bona fide homologs of *Drosophila* and mouse genes.** To  
924 systematically assess putative gene homology relationships between  
925 *Drosophila melanogaster* or *Mus musculus* and *Platynereis dumerilii*, we used

926 the *tblastn* algorithm to compare all *Drosophila melanogaster* or *Mus*  
927 *musculus* protein sequences in the ENSEMBL database  
928 (*Drosophila\_melanogaster*.BDGP6.pep.all.fa (10th March 2016);  
929 *Mus\_musculus*.GRCm38.pep.all.fa (10th March 2016)) to all transcripts in our  
930 *P. dumerilii de novo* assembled transcriptome. To each *D. melanogaster* or *M.*  
931 *musculus* gene ID, we assigned the *P. dumerilii* gene with the best *tblastn* hit,  
932 with a stringent E value threshold of 1E-20.

### 933 **Identification of *P. dumerilii* components of the phototransduction**

934 **pathway**. To identify *P. dumerilii* components of the canonical r-Opson  
935 phototransduction pathway, we assigned *bona fide* *P. dumerilii* homologs to  
936 the key components of the *D. melanogaster phototransduction pathway* (**Fig.**  
937 **2B**; R-Opson, Gaq, Gb, Gg, NorpA/PLC, INAC/PKC, Trp, Trpl, INAD, Cam,  
938 NINAC/MyoIII; Arrestin2, PIP5K). The corresponding ENSEMBL  
939 (*Drosophila\_melanogaster*.BDGP6.pep.all.fa (10th March 2016)) gene  
940 symbols are as follows: R-Opson: NinaE/Rh3/Rh4/Rh5/Rh6; Gaq: Galphaq;  
941 Gb: Gbeta76C; Gg: Ggamma30A; NorpA/PLC: NorpA; INAC/PKC: InaC; Trp:  
942 Trp; Trpl: Trpl; INAD: InaD; CaM: Cam; NINAC/MyoIII: NinaC; Arrestin2: Arr2;  
943 PIP5K: PIP5K59B. To each *D. melanogaster* protein we assigned the best *P.*  
944 *dumerilii tblastn* hit, with an E value threshold of 1e-20, as described above.  
945 Two proteins (Gg and InaD) had no *P. dumerilii tblastn* hits that satisfied this  
946 stringent threshold. Therefore, to assign *P. dumerilii* homologs to these  
947 proteins, we lowered the stringency of the E value threshold to 1e-8. To  
948 corroborate that *c33855* is a *bona fide* homolog of Gg (E value 2e-9), we  
949 confirmed that this *P. dumerilii* gene is the best *tblastn* hit of the *M. musculus*  
950 Gg counterpart (Gng; E value against *c33855*: 2e-9). Similarly, to corroborate  
951 that *c7982* is a homolog of InaD (E value 2e-16), we confirmed that this gene  
952 is the best *tblastn* hit of the *M. musculus* InaD counterpart (Mpdz; E value  
953 against *c7982*: 2e-81).

954 **Statistical assessment of subset specificity**. To assess whether the  
955 number of EP- and/or TRE-expressed/enriched genes overlapping with the *P.*  
956 *dumerilii* homologs of a set of N *D. melanogaster* or *M. musculus* genes was  
957 meaningful, we generated 10<sup>4</sup> sets of N randomly-picked *D. melanogaster* or  
958 *M. musculus* genes, and performed the same analysis as for our real set of N  
959 *D. melanogaster* or *M. musculus* genes. We then determined the frequency



960 with which such randomly generated sets resulted in an overlap that was  
961 equal or higher than that found for our real set.

962 **Molecular phylogenetic analysis of plasma membrane Calcium-**  
963 **Transporting ATPases and related proteins.** Candidate Plasma membrane  
964 Calcium-Transporting ATPases and related proteins were identified from the  
965 *Platynereis dumerilii* transcriptome with the *tblastn* algorithm, using selected  
966 animal homologs as query (see **Fig.5- figure supplement 1A**). Predicted  
967 sponge proteins were aligned with their counterparts from other animals using  
968 MUSCLE [81], and molecular phylogenetic analyses were performed using  
969 the IQTREE software [82].

970

### 971 **Analysis and validation of differentially expressed genes**

972 To validate the results of our differential expression analysis, we selected 2  
973 common EP-/TRE-enriched genes (*ngbl/c10609* and *tmdc/c2433*), and 3  
974 TRE-specific genes (*f8a/c6996*, *dmd/c7924* and *trpA/c7677*). The genes  
975 selected cover a wide FDR range in our statistical analysis (**Fig.2- figure**  
976 **supplement 2**). *ngbl/c10609* and *tmdc/c2433* are among the top enriched  
977 genes in both EP and TRE samples (FDR < 0.01), whereas *trpA/c7677* (FDR  
978 = 0.038) is close to the significance threshold (**Fig.2- figure supplement 2**).  
979 The low FDR values for *ngbl/c10609* and *tmdc/c2433* reflect the high level of  
980 expression of these genes in the EP and TRE samples for all three biological  
981 replicates, and the low level of expression in the unsorted samples (**Fig.2-**  
982 **figure supplement 1A,B**). From these data, we expected that *ngbl/c10609*  
983 and *tmdc/c2433* would be expressed at low levels (or not expressed at all) in  
984 any cell type other than EP and TRE cells. We used the established single- or  
985 two-color whole mount *in situ* hybridization (WMISH) [75] with *r-opsin1* as  
986 reference. Within the head, *r-opsin1* is prominently expressed in the four adult  
987 eyes [17], which is reproduced in our controls (**Fig.2- figure supplement**  
988 **3C,D**, detected in red). Of note, a dense pigment cup covers the internal  
989 portion of each eye that contains the photosensitive outer segments of the  
990 retinal photoreceptors [31]. This pigmented area can be seen as a dark area  
991 in the eyes (**Fig.2- figure supplement 3C.D**), which partially shields the *r-*  
992 *opsin1* staining. However, due to the localization of the photoreceptor cell

993 bodies (and those of the support cells) outside the pigment cup, gene  
994 expression can be assessed in this apparent circle around the pigment cup  
995 (broken white contour in **Fig.2- figure supplement 3D**). In this non-  
996 pigmented area of the eyes, the red staining for *r-opsin* was clearly discernible  
997 (**Fig.2- figure supplement 3D**). Single-color ISH using a probe against  
998 *ngbl/c10609* showed expression of this gene in the EP as well (**Fig.2- figure**  
999 **supplement 3E,F**, blue staining), confirmed by two-color-WMISH (**Fig.2-**  
1000 **figure supplement 3G,H**, arrowhead).

1001 The TRE cells in the trunk of the worm are apparent as single, *r-opsin1*-  
1002 positive cells within each parapodium in the ventral flap of the dorsal  
1003 parapodial arm (ref. [17]; **Fig. 3D,E** and **Fig.2- figure supplement 4A,D,E**,  
1004 red staining). When tested on trunk samples, the probe for *ngbl/c10609*  
1005 revealed a similar expression pattern to *r-opsin1* (**Fig.2- figure supplement**  
1006 **4B**, blue staining). Two-color-WMISH confirmed the co-expression (**Fig.2-**  
1007 **figure supplement 4C**, purple color, arrowhead).

1008 Similarly, a riboprobe against *tmdc/c2433* revealed specific staining in the EP  
1009 cells as well as single cells within each parapodium, in a position consistent  
1010 with the TRE cells [32].

1011 Specific expression of the three selected TRE-specific genes, was also  
1012 validated using single- and double-WMISH. A probe against *trpA/c7677*  
1013 shows no expression in the eyes (**Fig.2- figure supplement 3I,J**), while  
1014 *trpA/c7677* is detected in small spots in each parapodium (**Fig.2- figure**  
1015 **supplement 4F,G**, blue staining). Two-colour-WMISH shows that one of the  
1016 spots in each parapodium overlaps with *ropsin1* expression, limited to only  
1017 part of the cell (**Fig. 3E**). *f8a/c6996* and *dmd/c7924* were also expressed in a  
1018 single cell in the ventral flap of the dorsal arm of each parapodium, in a  
1019 position that is consistent with the TRE cell (**Fig.2- figure supplement 4H-K**),  
1020 while expression in the eyes was undetected (*f8a/c6996*; **Fig.2- figure**  
1021 **supplement 3K,L**) or extremely weak (*dmd/c7924*; **Fig.2- figure supplement**  
1022 **3M,N**). Along with our set of control genes, these additional validations yield a  
1023 total of 10 genes that confirm our enrichment analysis (**Fig.2- figure**  
1024 **supplement 2**). The confirmation of *f8a/c6996*, *dmd/c7924* and *trpA/c7677*,  
1025 with relatively low level of expression and moderate enrichment FDR values  
1026 (**Fig.2- figure supplement 2**) particularly strengthens the validity of our

1027 analysis. It is worth noting that genes expressed at low levels are more likely  
1028 affected by stochasticity effects during cDNA synthesis and amplification than  
1029 their highly abundant counterparts. This provides a likely explanation why  
1030 *dmd/c7924* and *trpA/c7677* are detected, respectively, in two and one of the  
1031 three biological replicates in TRE cells ([Fig.2- figure supplement 1D,E](#)).

1032

### 1033 **Bioluminescence assays to assess Gαq, Gαs and Gαi/o coupling**

1034 To test whether *P. dumerilii* rOpsin1 can activate Gαq, Gαs or Gαi/o GPCR  
1035 signaling upon light exposure, we adapted established cell culture second  
1036 messenger assays [51]. For this, the *P. dumerilii r-opsin1* gene was  
1037 heterologously expressed in HEK293 cells. Co-transfected luminescence  
1038 reporters assessed either activation of Gαq signaling (pcDNA5/FRT/TO  
1039 mtAeq; expressing *aequorin* as reporter of intracellular calcium [83]) or  
1040 activation of Gαs or Gαi/o signaling (pcDNA5/FRT/TO Glo22F). Transfected  
1041 cells were incubated overnight with the chromophore 9-cis retinal in single  
1042 wells of a 96-well plate. Cells were then incubated with 10μM Coelenterazine  
1043 (for Gαq) or 0.1M Luciferin (for Gαs or Gαi/o, respectively) in the dark for 2  
1044 hours, and were subsequently exposed to a 2s (for Gαq and Gαi/o) or 30s (for  
1045 Gαs) pulse of white light. The white light pulse was generated by an Arc lamp,  
1046 spectrum in [Fig.4- figure supplement 1C](#). Raw luminescence was measured  
1047 from each single well on a Fluostar Optima plate reader (BMG Labtech,  
1048 Germany). While the well under recording was exposed to the light pulse, all  
1049 other wells were protected from light with a black sheet. To assess activation  
1050 of Gαq signaling, luminescence was measured with a resolution of 0.5s and  
1051 cycle of 2s. To assess activation of Gαs signaling, increase in cyclic  
1052 Adenosine Monophosphate (cAMP) levels was assessed by measuring  
1053 luminescence with a resolution of 1s and cycle of 30s. To assess activation of  
1054 Gαi/o signaling, cells were treated with 2μM Forskolin (Sigma-Aldrich) prior to  
1055 the light pulse, and decrease in cAMP levels was assessed by measuring  
1056 luminescence with a resolution of 1s and cycle of 30s. The time between the  
1057 light exposure to the well and the recording of raw luminescence  
1058 measurements was approximately 3s. Measurements taken during the dark  
1059 incubation preceding the light pulse were used as baseline. As positive

1060 controls, we used established constructs for jellyfish Opsin ( $G\alpha s$  assay; ref.  
1061 [53]), human Rhodopsin 1 ( $G\alpha i/o$  assay; ref. [53]) and human Opn4 ( $G\alpha q$   
1062 assay, ref. [51]).

### 1063 **Measurement of spectral sensitivity of *P. dumerilii* r-Opsin1**

1064 To determine the spectral sensitivity of *Platynereis* r-Opsin1, the  
1065 aforementioned bioluminescence assay was further refined. Band-pass (420,  
1066 442, 458, 480, 500, 520, 540, 568 and 600nm) and neutral density filters (0-  
1067 3.5) (**Fig.4- figure supplement 1D,E**) were used to deliver defined irradiance  
1068 doses of distinct wavelengths in 2s light pulses. Maximum luminescence  
1069 levels acquired from three independent replicates were plotted against the  
1070 respective irradiance doses used. Individual irradiance response curves for a  
1071 given wavelength were then fitted to a sigmoidal dose response function  
1072 (variable slope, minimal asymptote value constrained to the average raw  
1073 luminescence baseline for each wavelength), allowing to derive  $EC_{50}$  values  
1074 (irradiance required to elicit half-maximal luminescence responses) for each  
1075 wavelength (**Fig.4- figure supplement 1F**). The relative sensitivity at each  
1076 wavelength was calculated as described in ref. [51]. Likewise, the fitting of  
1077 data to the Govardovskii visual templates for each wavelength, and the  
1078 determination of the curve with the best fit to the measured data to determine  
1079  $\lambda_{max}$  of *Platynereis* r-Opsin1 in cell culture (**Fig. 4B,C**) followed established  
1080 procedures [51].

### 1081 **Enrichment of *atp2b2* mRNA expression in zebrafish neuromasts** 1082 **cells**

1083 The  $TG(pou4f3:GAP-GFP)^{s356t}$  transgenic zebrafish line was used for this  
1084 experiment, which expresses membrane-targeted GFP under the control of  
1085 the *brn3c* promoter/enhancer [49]. 30 transgenic or non-transgenic larvae at 6-  
1086 10 days post-fertilization were decapitated under a stereoscopic microscope.  
1087 Trunks were dissociated by incubating them in 0.5% Trypsin-EDTA 10x  
1088 (59418C-100ml Sigma Aldrich) diluted in PBS for 3-4 min, and shearing  
1089 through a 1ml pipette tip for an additional 6 min. Cell preparations were  
1090 filtered once through a 70  $\mu m$  cell-strainer (Falcon, USA), and three times  
1091 through 35 $\mu m$  nylon mesh cell-strainers (5ml polystyrene round-bottom tube  
1092 with cell-strainer cap, Art. #352235, Falcon), and were then placed on ice.

1093 Cell suspensions were stained with propidium iodide (PI; ThermoFisher  
1094 Scientific, P1304MP) by adding 8µl of 1.5mg/ml PI per ml of cell suspension,  
1095 and were kept on ice until FAC-sorted. To isolate GFP<sup>+</sup> neuromast cells cell  
1096 suspensions were analyzed on a FACS Aria IIIu FAC Sorter (BD Bio-  
1097 sciences), using the same gating strategy as above for the isolation of EGFP<sup>+</sup>  
1098 cells from *Platynereis*. Non-transgenic cell preparations were used to  
1099 distinguish EGFP<sup>+</sup> cells from autofluorescent cells, and therefore be able to  
1100 accurately design the EGFP<sup>+</sup> gate. EGFP<sup>+</sup> cells were directly FAC-sorted into  
1101 RLT lysis buffer (Qiagen). After collection, Lysate was vortex for 30 sec and  
1102 stored at -80°C. A sample of unsorted cell preparation was lysed, to be used  
1103 as unsorted sample.

1104 Total RNA was isolated from EGFP<sup>+</sup> FAC-sorted and unsorted cell lysates by  
1105 using the RNeasy mini kit (Qiagen) according to manufacturer's guidelines,  
1106 cDNA was synthesized by using the QuantiTect Reverse Transcription kit  
1107 (Qiagen) according to manufacturer's guidelines. To measure gene  
1108 expression levels of *actb*, *opn4xb* and *atp2b2*, quantitative PCR (qPCR) was  
1109 performed on 96-well plates, in a StepOne Real-Time PCR System (Applied  
1110 Biosystems) using SybrGreen chemistry (Thermo Fischer Scientific). The total  
1111 volume of all qPCR reactions was 20 µl. Measured expression levels were  
1112 used to calculate enrichments, normalizing to the *actb* levels. Statistical  
1113 significance of enrichment was tested on the QPCR relative number of cycles  
1114 at threshold (cycles at threshold for *opn4xb* or *atp2b2* relative to *actb*) in  
1115 EGFP<sup>+</sup> samples compared to unsorted samples. Bartlett's test was used to  
1116 test for equal variance.

## 1117 **Behavioral analyses**

1118 **Light-induced crawling movement.** To assess the light-induced crawling  
1119 response of immature wild-type and *r-opsin1* mutant trunks, we followed a  
1120 previously established method [17]. For both wild-type and *r-opsin1* mutant  
1121 genotypes, we used the pMos{rops::egfp}<sup>vbc12</sup> transgenic background. Animals  
1122 were screened prior to the assay to ensure similar EGFP fluorescence  
1123 intensity.

1124 **Undulation Behavior Analysis:** Wild-type and *r-opsin1* mutant genotypes  
1125 were used in the pMos{rops::egfp}<sup>vbc12</sup> transgenic background. Worms were

1126 kept unfed for 3 days prior to the start of the experiment. On the day of the  
1127 start of the experiment, worms were decapitated and then placed in individual  
1128 hemispherical concave wells of a custom-made 25-well clear plate [30,63]. To  
1129 obtain trunks, specimens were anesthetized by using a 1:1 solution of  
1130 seawater and 7.5% MgCl<sub>2</sub>, placed on a microscope slide under a binocular  
1131 dissecting microscope, and decapitated using a surgical blade (#22; Schreiber  
1132 Instrumente GmbH, Germany). To increase the chance that decapitated  
1133 worms could build tubes, the decapitation plane was chosen anterior to the  
1134 pharyngeal region.

1135 Video recording of worm behavior over several days was accomplished as  
1136 described previously [59,63]. Prior to recording, worms were incubated for 2–  
1137 4 hours to allow them to build tubes, which is part of their normal behavior.  
1138 During the recording, worms were subjected to one complete light-dark cycle  
1139 (16 h light/8 h darkness), followed by 4 days of constant darkness. White light  
1140 was generated by custom made LEDs (Marine Breeding Systems, St. Gallen,  
1141 Switzerland), reaching worms with an intensity of  $5.2 \times 10^{14}$  photons/cm<sup>2</sup>/s.  
1142 Analyses focused on Zeitgeber Time (ZT) 6-14 of the LD cycle (LD1), and  
1143 circadian time (CT) 6-14 of the first DD cycle (DD1). ZT0: start of lights on.  
1144 Worms that had not built a tube during the first hours of the recording, or  
1145 those that had matured by the end of the experiment, were excluded from  
1146 further analysis.

1147 Undulation analysis was performed using positional data of 7 discrete body  
1148 points (**Fig.5- figure supplement 3A**), obtained via a deep learning based  
1149 key point prediction algorithm. The algorithm/neural network was created via  
1150 the interface of Loopy, developed by loopbio GmbH (Vienna, Austria,  
1151 <http://loopbio.com>). For training the network, points were manually annotated  
1152 using 2,740 individual frames obtained from different recordings with the set-  
1153 up described above. To ensure high diversity of the training set, chosen  
1154 recordings covered different sizes and shapes of worms as well as different  
1155 times of the day. The subsequent data analysis was carried out in Python  
1156 3.7.9 using the SciPy (1.5.2), pandas (1.1.3) and NumPy (1.19.2) packages  
1157 [84-86].

1158 The positional data was first checked for sufficient prediction coverage: worms  
1159 for which any single point was annotated in less than 90% of the frames were  
1160 excluded from further analysis. For the retained individuals, any missing XY  
1161 values were inferred linearly from non-missing data. To identify undulation,  
1162 power spectral density was estimated on 10 second intervals for the position  
1163 of each body point excluding the jaw and the tail by means of a periodogram.  
1164 For every point, the dominant frequency within the given time-window was  
1165 determined. A movement was defined as undulation if any of the 5 body  
1166 points showed a total movement of 0.5 – 10 pixels and had a dominant  
1167 frequency within a range of 0.5 – 1.5Hz. Undulation ratios obtained by  
1168 manually scoring video segments were used to benchmark the automated  
1169 algorithm (**Fig.5- figure supplement 3B,C**).

1170 All statistical tests were done using R (version 3.6.1). First, from the  
1171 undulation ratios the area under the curve was calculated for every replicate  
1172 and then the datasets were tested for normal distribution (Shapiro-Wilk  
1173 normality test). To determine if there were differences between the groups,  
1174 either a paired (light versus dark) Wilcoxon signed rank test or an unpaired  
1175 (wildtype versus mutant) Wilcoxon rank sum test was conducted. Results  
1176 were considered statistically significant with a p-value <0.05.

### 1177 **Transcriptome profiling**

1178 After addition of 2µl of dNTP mix (10mM each; Fermentas, R0192), 2µl of  
1179 oligo-dT-30VN primer (10µM; 5' -  
1180 AAGCAGTGGTATCAACGCAGAGTACT30VN-3'), and ERCC spike-in RNA  
1181 (Ambion) (1:1,000,000 dilution) to the lysates of FAC-sorted or unsorted cells,  
1182 mRNA isolation, cDNA synthesis with amplification was performed according  
1183 to the standard Smart-Seq2 protocol [25]. Single-end 50bp-read sequencing  
1184 of the cDNA libraries was performed on an Illumina HiSeq3000/4000 platform  
1185 according to the manufacturer's protocol. For all samples, transcriptome  
1186 profiles for three independent biological replicates were obtained.

### 1187 ***In-situ* hybridization and imaging**

1188 In-situ hybridization and dual-color in-situ hybridization on whole heads and  
1189 trunk pieces (5-10 segments) of immature worms were performed according

1190 to established methods [17]. Whole heads and trunk pieces were mounted on  
1191 glass slides and imaged on a Zeiss Axio Imager with 10x or 40x oil immersion  
1192 objectives. Single parapodia were cut out of the trunk pieces, mounted on  
1193 glass slides and imaged with 10x or 40x oil immersion objectives. A Zeiss  
1194 Axiocam MR5 camera was used for documentation of stainings.

### 1195 **Generation of *r-opsin1* mutant strains**

1196 The *r-opsin1* genomic region was amplified to screen putative size  
1197 polymorphic alleles or single nucleotide polymorphisms (SNPs) from different  
1198 *Platynereis* strains (PIN, VIO and ORA) using the following primer  
1199 combinations: rops1\_F1/R1, rops1\_F2/R2, rops1\_F3/R3, rops1\_F4/R4 and  
1200 rops1\_F5/R5. The target alleles or SNPs were screened as described in ref.  
1201 [20]. *r-opsin1* TAL Effector Nuclease (TALEN) pairs were designed in several  
1202 non-polymorphic exon regions using the TALE-NT prediction tool [87]. *In silico*  
1203 predictions were performed by using customized design conditions, 15  
1204 left/right Repeat Variable Diresidue (RVD) length, 15-25bp spacer length, G  
1205 substitute by NN RVD and presence of exclusive restriction enzyme site  
1206 around the spacer region. The predicted *r-opsin1* TALENs were constructed  
1207 *in vitro* using Golden Gate assembly protocol (Golden Gate TAL Effector Kit  
1208 2.0, Addgene #1000000024) [88]. The final TALEN repeats were cloned to  
1209 heterodimeric FokI expression plasmids pCS2TAL3-DD for left TALEN array  
1210 and pCS2TAL3-RR for right TALEN array [89]. All cloned TALEN plasmids  
1211 were sequence-verified using TAL\_F1 and TAL\_R2 primers. *r-opsin1* TALEN  
1212 mRNA for each array were made by linearizing the corresponding plasmid by  
1213 NotI digestion and transcribed *in vitro* using mMESSAGING mMACHINE Sp6 kit.  
1214 Two TALEN pairs targeting exon 1 of *r-opsin1* were designed and generated  
1215 using the above *in vitro* assembly protocol. Both *r-opsin1* TALEN spacer  
1216 regions were flanked with restriction sites (TAL 1 – Bts1 and TAL 2 – Taa1).  
1217 Following microinjection of 200ng/μl *r-opsin1* TALEN mRNA, the *Platynereis*  
1218 embryos were screened for mutations using incomplete restriction digestion  
1219 and confirmed by sequencing the undigested band. Several injected embryos  
1220 were raised and outcrossed to wildtype. The F1 outcrossed worms were  
1221 screened for mutations with a similar restriction digest procedure. Two  
1222 deletion and insertion mutations were recovered (17bp deletion and 1bp



1223 deletion). Mutant worms were raised and crossed for several generations to  
1224 generate both homozygous incross strains and respective wild-type relatives.

### 1225 **Light and temperature conditions**

1226 *r-opsin1*-mutant pMos{rops::egfp}<sup>vbc12</sup> worms and the corresponding  
1227 pMos{rops::egfp}<sup>vbc12</sup> control individuals used for transcriptomic analysis, were  
1228 incubated without feeding for 3 - 5 days before the experiment. Blue light of  
1229 470nm was generated using LEDs. The resulting spectrum and intensity of  
1230 the light was measured using a SpectriLight ILT950 Spectroradiometer  
1231 (International Light Technologies, MA, USA) (**Fig. 5B**). The temperature (kept  
1232 between 18.5 and 20°C) was monitored during the 3 - 5 days of blue light  
1233 incubation using a HOBO Pendant Temperature/Light Data Logger (Part #UA-  
1234 002-64, Onset Computer Corporation, MA, USA).

1235 EGFP transgenic worms used for transcriptomic analysis at distinct light  
1236 conditions were incubated for 3 - 5 days in blue light or in dim white light after  
1237 decapitation. Blue light conditions were as described above. Dim white light  
1238 conditions were obtained by placing the worms in an area partially protected  
1239 from light within a room with standard white light illumination. The exact  
1240 spectrum and intensity of the light (see **Fig. 5B**) was determined using the  
1241 same spectroradiometer as described above. The temperature was monitored  
1242 with a similar device as described above, and was kept within the same range  
1243 as in the blue light conditions (18.5 to 20°C).

1244 **Metadata/ source files availability**

1245 All metadata and source files are available for download from DRYAD:

1246 [https://datadryad.org/stash/share/ AWaPRHfmuHKYq9CzHt7YNtmaAgHFQXi](https://datadryad.org/stash/share/AWaPRHfmuHKYq9CzHt7YNtmaAgHFQXi)

1247 [fklkVE1n6Sl](https://datadryad.org/stash/share/AWaPRHfmuHKYq9CzHt7YNtmaAgHFQXi).

1248

1249 doi:10.5061/dryad.m63xsj416

1250

1251 This includes raw data, scripts, and the newly assembled and size-filtered  
1252 transcriptome, used for quantitative mapping (cf. section on Transcriptome  
1253 profiling).

## 1254 REFERENCES

- 1255 [1] Arendt D, Wittbrodt J. Reconstructing the eyes of Urbilateria. *Philos*  
1256 *Trans R Soc Lond B Biol Sci* 2001;356:1545–63.  
1257 doi:10.1098/rstb.2001.0971.
- 1258 [2] Arendt D, Tessmar K, de Campos-Baptista M-IM, Dorresteyn A,  
1259 Wittbrodt J. Development of pigment-cup eyes in the polychaete  
1260 *Platynereis dumerilii* and evolutionary conservation of larval eyes in  
1261 Bilateria. *Development* 2002;129:1143–54.
- 1262 [3] Ramirez MD, Pairett AN, Pankey MS, Serb JM, Speiser DI, Swafford  
1263 AJ, et al. The last common ancestor of most bilaterian animals  
1264 possessed at least nine opsins. *Genome Biol Evol* 2016;8:3640–52.  
1265 doi:10.1093/gbe/evw248.
- 1266 [4] Hardie RC, Juusola M. Phototransduction in *Drosophila*. *Curr Opin*  
1267 *Neurobiol* 2015;34:37–45. doi:10.1016/j.conb.2015.01.008.
- 1268 [5] Raible F, Tessmar-Raible K, Arboleda E, Kaller T, Bork P, Arendt D, et  
1269 al. Opsins and clusters of sensory G-protein-coupled receptors in the  
1270 sea urchin genome. *Dev Biol* 2006;300:461–75.  
1271 doi:10.1016/j.ydbio.2006.08.070.
- 1272 [6] Ullrich-Lüter EM, Dupont S, Arboleda E, Hausen H, Arnone MI.  
1273 Unique system of photoreceptors in sea urchin tube feet  
1274 2011;108:8367–72. doi:10.1073/pnas.1018495108.
- 1275 [7] Koyanagi M, Kubokawa K, Tsukamoto H, Shichida Y, Terakita A.  
1276 Cephalochordate melanopsin: evolutionary linkage between  
1277 invertebrate visual cells and vertebrate photosensitive retinal ganglion  
1278 cells. *Curr Biol* 2005;15:1065–9. doi:10.1016/j.cub.2005.04.063.
- 1279 [8] Sumner-Rooney L, Kirwan JD, Lowe E, Ullrich-Lüter E. Extraocular  
1280 vision in a brittle star is mediated by chromatophore movement in  
1281 response to ambient light. *Curr Biol* 2020;30:319–327.e4.  
1282 doi:10.1016/j.cub.2019.11.042.
- 1283 [9] Dzik J. Early Cambrian lobopodian sclerites and associated fossils  
1284 from Kazakhstan. *Palaeontology* 2003;46:93–112. doi:10.1111/1475-  
1285 4983.00289.
- 1286 [10] Gehring WJ. Chance and necessity in eye evolution. *Genome Biol*  
1287 *Evol* 2011;3:1053–66. doi:10.1093/gbe/evr061.
- 1288 [11] Purschke G, Arendt D, Hausen H, Müller MCM. Photoreceptor cells  
1289 and eyes in Annelida. *Arthropod Struct Dev* 2006;35:211–30.  
1290 doi:10.1016/j.asd.2006.07.005.
- 1291 [12] Couso JP. Segmentation, metamerism and the Cambrian explosion.  
1292 *Int J Dev Biol* 2009;53:1305–16. doi:10.1387/ijdb.072425jc.
- 1293 [13] Dray N, Tessmar-Raible K, Le Gouar M, Vibert L, Christodoulou F,  
1294 Schipany K, et al. Hedgehog signaling regulates segment formation in  
1295 the annelid *Platynereis*. 2010;329:339–42.  
1296 doi:10.1126/science.1188913.
- 1297 [14] Chen Z, Zhou C, Yuan X, Xiao S. Death march of a segmented and  
1298 trilobate bilaterian elucidates early animal evolution. *Nature*  
1299 2019;573:412–5. doi:10.1038/s41586-019-1522-7.
- 1300 [15] Senthilan PR, Piepenbrock D, Ovezmyradov G, Nadrowski B,  
1301 Bechstedt S, Pauls S, et al. *Drosophila* auditory organ genes and

- 1302 genetic hearing defects. *Cell* 2012;150:1042–54.  
1303 doi:10.1016/j.cell.2012.06.043.
- 1304 [16] Zanini D, Giraldo D, Warren B, Katana R, Andrés M, Reddy S, et al.  
1305 Proprioceptive Opsin functions in *Drosophila* larval locomotion.  
1306 *Neuron* 2018;98:67–74.e4. doi:10.1016/j.neuron.2018.02.028.
- 1307 [17] Backfisch B, Veedin Rajan VB, Fischer RM, Lohs C, Arboleda E,  
1308 Tessmar-Raible K, et al. Stable transgenesis in the marine annelid  
1309 *Platynereis dumerilii* sheds new light on photoreceptor evolution. *Proc*  
1310 *Natl Acad Sci USA* 2013;110:193–8. doi:10.1073/pnas.1209657109.
- 1311 [18] Baker GE, de Grip WJ, Turton M, Wagner H-J, Foster RG, Douglas  
1312 RH. Light sensitivity in a vertebrate mechanoreceptor? *J Exp Biol*  
1313 2015;218:2826–9. doi:10.1242/jeb.125203.
- 1314 [19] Fritzscht B, Piatigorsky J, Tessmar-Raible K, Jékely G, Guy K, Raible  
1315 F, et al. Ancestry of photic and mechanic sensation? 2005;308:1113–  
1316 4. doi:10.1126/science.308.5725.1113.
- 1317 [20] Bannister S, Antonova O, Polo A, Lohs C, Hallay N, Valinciute A, et al.  
1318 TALENs mediate efficient and heritable mutation of endogenous  
1319 genes in the marine annelid *Platynereis dumerilii*. *Genetics*  
1320 2014;197:77–89. doi:10.1534/genetics.113.161091.
- 1321 [21] Gühmann M, Jia H, Randel N, Verasztó C, Bezares-Calderón LA,  
1322 Michiels NK, et al. Spectral tuning of phototaxis by a Go-opsin in the  
1323 rhabdomeric eyes of *Platynereis*. *Curr Biol* 2015;25:2265–71.  
1324 doi:10.1016/j.cub.2015.07.017.
- 1325 [22] Bezares-Calderón LA, Berger J, Jasek S, Verasztó C, Mendes S,  
1326 Gühmann M, et al. Neural circuitry of a polycystin-mediated  
1327 hydrodynamic startle response for predator avoidance. *Elife*  
1328 2018;7:e01668. doi:10.7554/eLife.36262.
- 1329 [23] Fischer A, Dorresteijn A. The polychaete *Platynereis dumerilii*  
1330 (Annelida): a laboratory animal with spiralian cleavage, lifelong  
1331 segment proliferation and a mixed benthic/pelagic life cycle. *Bioessays*  
1332 2004;26:314–25.
- 1333 [24] Randel N, Bezares-Calderón LA, Gühmann M, Shahidi R, Jékely G.  
1334 Expression dynamics and protein localization of rhabdomeric opsins in  
1335 *Platynereis* larvae. *Integr Comp Biol* 2013;53:7–16.  
1336 doi:10.1093/icb/ict046.
- 1337 [25] Picelli S, Faridani OR, Björklund AK, Winberg G, Sagasser S,  
1338 Sandberg R. Full-length RNA-seq from single cells using Smart-seq2.  
1339 *Nat Protoc* 2014;9:171–81. doi:10.1038/nprot.2014.006.
- 1340 [26] Zantke J, Ishikawa-Fujiwara T, Arboleda E, Lohs C, Schipany K,  
1341 Hallay N, et al. Circadian and circalunar clock interactions in a marine  
1342 annelid. *Cell Rep* 2013;5:99–113. doi:10.1016/j.celrep.2013.08.031.
- 1343 [27] Robinson MD, McCarthy DJ, Smyth GK. edgeR: a Bioconductor  
1344 package for differential expression analysis of digital gene expression  
1345 data. *Bioinformatics* 2010;26:139–40.  
1346 doi:10.1093/bioinformatics/btp616.
- 1347 [28] Tomer R, Denes AS, Tessmar-Raible K, Arendt D. Profiling by image  
1348 registration reveals common origin of annelid mushroom bodies and  
1349 vertebrate pallium. *Cell* 2010;142:800–9.  
1350 doi:10.1016/j.cell.2010.07.043.

- 1351 [29] Randel N, Asadulina A, Bezares-Calderón LA, Verasztó C, Williams  
1352 EA, Conzelmann M, et al. Neuronal connectome of a sensory-motor  
1353 circuit for visual navigation. *Elife* 2014;3:e02730.  
1354 doi:10.7554/eLife.02730.
- 1355 [30] Ayers T, Tsukamoto H, Gühmann M, Veedin Rajan VB, Tessmar-  
1356 Raible K. A Go-type opsin mediates the shadow reflex in the annelid  
1357 *Platynereis dumerilii*. *BMC Biol* 2018;16:41–9. doi:10.1186/s12915-  
1358 018-0505-8.
- 1359 [31] Fischer A, Brökelmann J. Das Auge von *Platynereis dumerilii*  
1360 (Polychaeta): Sein Feinbau im ontogenetischen und adaptiven Wandel  
1361 [The eye of *Platynereis dumerilii* (Polychaeta): Its fine structure in  
1362 ontogenetic and adaptive change]. *Z Zellforsch Mikrosk Anat*  
1363 1966;71:217–44.
- 1364 [32] Pende M, Vadiwala K, Schmidbaur H, Stockinger AW, Murawala P,  
1365 Saghafi S, et al. A versatile depigmentation, clearing, and labeling  
1366 method for exploring nervous system diversity. *Science Advances*  
1367 2020;6:eaba0365. doi:10.1126/sciadv.aba0365.
- 1368 [33] Denes AS, Jékely G, Steinmetz PRH, Raible F, Snyman H,  
1369 Prud'homme B, et al. Molecular architecture of annelid nerve cord  
1370 supports common origin of nervous system centralization in Bilateria.  
1371 *Cell* 2007;129:277–88. doi:10.1016/j.cell.2007.02.040.
- 1372 [34] Kerner P, Simionato E, Le Gouar M, Vervoort M. Orthologs of key  
1373 vertebrate neural genes are expressed during neurogenesis in the  
1374 annelid *Platynereis dumerilii*. *Evol Dev* 2009;11:513–24.  
1375 doi:10.1111/j.1525-142X.2009.00359.x.
- 1376 [35] Yang Z, Edenberg HJ, Davis RL. Isolation of mRNA from specific  
1377 tissues of *Drosophila* by mRNA tagging. *Nucleic Acids Res*  
1378 2005;33:e148–8. doi:10.1093/nar/gni149.
- 1379 [36] Zou J, Zheng T, Ren C, Askew C, Liu X-P, Pan B, et al. Deletion of  
1380 PDZD7 disrupts the Usher syndrome type 2 protein complex in  
1381 cochlear hair cells and causes hearing loss in mice. *Hum Mol Genet*  
1382 2014;23:2374–90. doi:10.1093/hmg/ddt629.
- 1383 [37] Boëda B, El-Amraoui A, Bahloul A, Goodyear R, Daviet L, Blanchard  
1384 S, et al. Myosin VIIa, harmonin and cadherin 23, three Usher I gene  
1385 products that cooperate to shape the sensory hair cell bundle. *EMBO*  
1386 *J* 2002;21:6689–99. doi:10.1093/emboj/cdf689.
- 1387 [38] Neef J, Jung S, Wong AB, Reuter K, Pangršič T, Chakrabarti R, et al.  
1388 Modes and regulation of endocytic membrane retrieval in mouse  
1389 auditory hair cells. *J Neurosci* 2014;34:705–16.  
1390 doi:10.1523/JNEUROSCI.3313-13.2014.
- 1391 [39] Stapelbroek JM, Peters TA, van Beurden DHA, Curfs JHAJ, Joosten  
1392 A, Beynon AJ, et al. ATP8B1 is essential for maintaining normal  
1393 hearing. *Proc Natl Acad Sci USA* 2009;106:9709–14.  
1394 doi:10.1073/pnas.0807919106.
- 1395 [40] Schneider ME, Dosé AC, Salles FT, Chang W, Erickson FL, Burnside  
1396 B, et al. A new compartment at stereocilia tips defined by spatial and  
1397 temporal patterns of myosin IIIa expression. *J Neurosci*  
1398 2006;26:10243–52. doi:10.1523/JNEUROSCI.2812-06.2006.
- 1399 [41] Gou Y, Vemaraju S, Sweet EM, Kwon H-J, Riley BB. *Sox2* and *sox3*  
1400 play unique roles in development of hair cells and neurons in the

- 1401 zebrafish inner ear. *Dev Biol* 2018;435:73–83.  
1402 doi:10.1016/j.ydbio.2018.01.010.
- 1403 [42] Kiernan AE, Cordes R, Kopan R, Gossler A, Gridley T. The Notch  
1404 ligands DLL1 and JAG2 act synergistically to regulate hair cell  
1405 development in the mammalian inner ear. *Development*  
1406 2005;132:4353–62. doi:10.1242/dev.02002.
- 1407 [43] Oshima A, Suzuki S, Takumi Y, Hashizume K, Abe S, Usami S.  
1408 *CRYM* mutations cause deafness through thyroid hormone binding  
1409 properties in the fibrocytes of the cochlea. *J Med Genet* 2006;43:e25–  
1410 5. doi:10.1136/jmg.2005.034397.
- 1411 [44] Tan J, Prakash MD, Kaiserman D, Bird PI. Absence of SERPINB6A  
1412 causes sensorineural hearing loss with multiple histopathologies in the  
1413 mouse inner ear. *Am J Pathol* 2013;183:49–59.  
1414 doi:10.1016/j.ajpath.2013.03.009.
- 1415 [45] Donaudy F, Snoeckx R, Pfister M, Zenner H-P, Blin N, Di Stazio M, et  
1416 al. Nonmuscle myosin heavy-chain gene *MYH14* is expressed in  
1417 cochlea and mutated in patients affected by autosomal dominant  
1418 hearing impairment (DFNA4). *Am J Hum Genet* 2004;74:770–6.  
1419 doi:10.1086/383285.
- 1420 [46] Fu X, Zhang L, Jin Y, Sun X, Zhang A, Wen Z, et al. Loss of Myh14  
1421 increases susceptibility to noise-Induced hearing loss in CBA/CaJ  
1422 Mice. *Neural Plasticity* 2016;2016:1–16. doi:10.1155/2016/6720420.
- 1423 [47] Niwa N, Hiromi Y, Okabe M. A conserved developmental program for  
1424 sensory organ formation in *Drosophila melanogaster*. *Nat Genet*  
1425 2004;36:293–7. doi:10.1038/ng1308.
- 1426 [48] Fritsch B, Beisel KW, Pauley S, Soukup G. Molecular evolution of the  
1427 vertebrate mechanosensory cell and ear. *Int J Dev Biol* 2007;51:663–  
1428 78. doi:10.1387/ijdb.072367bf.
- 1429 [49] Xiao T, Roeser T, Staub W, Baier H. A GFP-based genetic screen  
1430 reveals mutations that disrupt the architecture of the zebrafish  
1431 retinotectal projection. *Development* 2005;132:2955–67.  
1432 doi:10.1242/dev.01861.
- 1433 [50] Scott K, Becker A, Sun Y, Hardy R, Zuker C. Gq alpha protein function  
1434 *in vivo*: genetic dissection of its role in photoreceptor cell physiology.  
1435 *Neuron* 1995;15:919–27. doi:10.1016/0896-6273(95)90182-5.
- 1436 [51] Bailes HJ, Lucas RJ. Human melanopsin forms a pigment maximally  
1437 sensitive to blue light ( $\lambda_{\max} \approx 479$  nm) supporting activation of  
1438 G(q/11) and G(i/o) signalling cascades. *Proceedings of the Royal*  
1439 *Society B: Biological Sciences* 2013;280:20122987.  
1440 doi:10.1098/rspb.2012.2987.
- 1441 [52] Arendt D, Tessmar-Raible K, Snyman H, Dorresteyn AW, Wittbrodt J.  
1442 Ciliary photoreceptors with a vertebrate-type opsin in an invertebrate  
1443 brain. 2004;306:869–71. doi:10.1126/science.1099955.
- 1444 [53] Bailes HJ, Zhuang L-Y, Lucas RJ. Reproducible and sustained  
1445 regulation of G $\alpha$ s signalling using a metazoan opsin as an optogenetic  
1446 tool. *PLoS One* 2012;7:e30774. doi:10.1371/journal.pone.0030774.
- 1447 [54] Govardovskii VI, Fyhrquist N, Reuter T, Kuzmin DG, Donner K. In  
1448 search of the visual pigment template. *Visual Neuroscience*  
1449 2000;17:509–28. doi:10.1017/s0952523800174036.

- 1450 [55] Street VA, McKee-Johnson JW, Fonseca RC, Tempel BL, Noben-  
1451 Trauth K. Mutations in a plasma membrane Ca<sup>2+</sup>-ATPase gene cause  
1452 deafness in deafwaddler mice. *Nat Genet* 1998;19:390–4.  
1453 doi:10.1038/1284.
- 1454 [56] Kozel PJ, Davis RR, Krieg EF, Shull GE, Erway LC. Deficiency in  
1455 plasma membrane calcium ATPase isoform 2 increases susceptibility  
1456 to noise-induced hearing loss in mice. *Hear Res* 2002;164:231–9.  
1457 doi:10.1016/s0378-5955(01)00420-8.
- 1458 [57] Klose MK, Boulianne GL, Robertson RM, Atwood HL. Role of ATP-  
1459 dependent calcium regulation in modulation of *Drosophila* synaptic  
1460 thermotolerance. *J Neurophysiol* 2009;102:901–13.  
1461 doi:10.1152/jn.91209.2008.
- 1462 [58] Chen X, Cuadros MD, Chalfie M. Identification of nonviable genes  
1463 affecting touch sensitivity in *Caenorhabditis elegans* using neuronally  
1464 enhanced feeding RNA interference. *G3 (Bethesda)* 2015;5:467–75.  
1465 doi:10.1534/g3.114.015776.
- 1466 [59] Arboleda E, Zurl M, Waldherr M, Tessmar-Raible K. Differential  
1467 impacts of the head on *Platynereis dumerilii* peripheral circadian  
1468 rhythms. *Front Physiol* 2019;10:900. doi:10.3389/fphys.2019.00900.
- 1469 [60] Horridge GA. Proprioceptors, bristle receptors, efferent sensory  
1470 impulses, neurofibrils and number of axons in the parapodial nerve of  
1471 the polychaete *Harmothoe*. *Proc R Soc Lond, B, Biol Sci*  
1472 1963;157:199–222. doi:10.1098/rspb.1963.0005.
- 1473 [61] Dorsett DA. The sensory and motor innervation of *Nereis*.  
1474 *Proceedings of the Royal Society of London B: Biological Sciences*  
1475 1964;159:652–67. doi:10.1098/rspb.1964.0024.
- 1476 [62] Schneider S, Fischer A, Dorresteyn AWC. A morphometric  
1477 comparison of dissimilar early development in sibling species of  
1478 *Platynereis (Annelida, Polychaeta)*. *Roux's Arch Dev Biol*  
1479 1992;201:243–56.
- 1480 [63] Veedin Rajan VB, Häfker NS, Arboleda E, Poehn B, Gossenreiter T,  
1481 Gerrard E, et al. Seasonal variation in UVA light drives hormonal and  
1482 behavioral changes in a marine annelid via a ciliary opsin. *Nat Ecol*  
1483 *Evol in press*. doi:10.1038/s41559-020-01356-1.
- 1484 [64] Liang C, FANTOM Consortium, Forrest ARR, Wagner GP. The  
1485 statistical geometry of transcriptome divergence in cell-type evolution  
1486 and cancer. *Nat Commun* 2015;6:6066–6. doi:10.1038/ncomms7066.
- 1487 [65] Arendt D, Musser JM, Baker CVH, Bergman A, Cepko C, Erwin DH, et  
1488 al. The origin and evolution of cell types. *Nat Rev Genet* 2016;17:744–  
1489 57. doi:10.1038/nrg.2016.127.
- 1490 [66] Arendt D, Bertucci PY, Achim K, Musser JM. Evolution of neuronal  
1491 types and families. *Curr Opin Neurobiol* 2019;56:144–52.  
1492 doi:10.1016/j.conb.2019.01.022.
- 1493 [67] Piatigorsky J, Kozmik Z. Cubozoan jellyfish: an Evo/Devo model for  
1494 eyes and other sensory systems. *Int J Dev Biol* 2004;48:719–29.  
1495 doi:10.1387/ijdb.041851jp.
- 1496 [68] Schlosser G. A short history of nearly every sense – The evolutionary  
1497 history of vertebrate sensory cell types. *Integr Comp Biol*  
1498 2018;58:301–16. doi:10.1093/icb/icy024.

- 1499 [69] Cosgrove D, Zallocchi M. Usher protein functions in hair cells and  
1500 photoreceptors. *The International Journal of Biochemistry & Cell*  
1501 *Biology* 2014;46:80–9. doi:10.1016/j.biocel.2013.11.001.
- 1502 [70] Katana R, Guan C, Zanini D, Larsen ME, Giraldo D, Geurten BRH, et  
1503 al. Chromophore-independent roles of Opsin apoproteins in  
1504 *Drosophila* mechanoreceptors. *Curr Biol* 2019;29:2961–4.  
1505 doi:10.1016/j.cub.2019.07.036.
- 1506 [71] Hardie RC, Franze K. Photomechanical responses in *Drosophila*  
1507 photoreceptors. 2012;338:260–3. doi:10.1126/science.1222376.
- 1508 [72] Leung NY, Thakur DP, Gurav AS, Kim SH, Di Pizio A, Niv MY, et al.  
1509 Functions of Opsins in *Drosophila* taste. *Curr Biol* 2020.  
1510 doi:10.1016/j.cub.2020.01.068.
- 1511 [73] Plachetzki DC, Fong CR, Oakley TH. The evolution of  
1512 phototransduction from an ancestral cyclic nucleotide gated pathway.  
1513 *Proceedings of the Royal Society B: Biological Sciences*  
1514 2010;277:1963–9. doi:10.1098/rspb.2009.1797.
- 1515 [74] Plachetzki DC, Fong CR, Oakley TH. Cnidocyte discharge is regulated  
1516 by light and opsin-mediated phototransduction. *BMC Biol* 2012;10:17–  
1517 10. doi:10.1186/1741-7007-10-17.
- 1518 [75] Tessmar-Raible K, Steinmetz PR, Snyman H, Hassel M, Arendt D.  
1519 Fluorescent two-color whole mount in situ hybridization in *Platynereis*  
1520 *dumerilii* (Polychaeta, Annelida), an emerging marine molecular model  
1521 for evolution and development. *Biotechniques* 2005;39:460–4.
- 1522 [76] Hauenschild C, Fischer A. *Platynereis dumerilii*. Mikroskopische  
1523 Anatomie, Fortpflanzung und Entwicklung [*Platynereis dumerilii*.  
1524 Microscopical anatomy, reproduction and development]. Großes  
1525 Zoologisches Praktikum, Stuttgart: G. Fischer Verlag; 1969.
- 1526 [77] Revilla-i-Domingo R, Schmidt C, Zifko C, Raible F. Establishment of  
1527 transgenesis in the demosponge *Suberites domuncula*. *Genetics*  
1528 2018;210:435–43. doi:10.1534/genetics.118.301121.
- 1529 [78] Grabherr MG, Haas BJ, Yassour M, Levin JZ, Thompson DA, Amit I,  
1530 et al. Full-length transcriptome assembly from RNA-Seq data without a  
1531 reference genome. *Nat Biotechnol* 2011;29:644–52.  
1532 doi:10.1038/nbt.1883.
- 1533 [79] Sedlazeck FJ, Rescheneder P, Haeseler von A. NextGenMap: fast  
1534 and accurate read mapping in highly polymorphic genomes.  
1535 *Bioinformatics* 2013;29:2790–1. doi:10.1093/bioinformatics/btt468.
- 1536 [80] Robinson MD, Oshlack A. A scaling normalization method for  
1537 differential expression analysis of RNA-seq data. *Genome Biol*  
1538 2010;11. doi:10.1186/gb-2010-11-3-r25.
- 1539 [81] Edgar RC. MUSCLE: multiple sequence alignment with high accuracy  
1540 and high throughput. *Nucleic Acids Res* 2004;32:1792–7.  
1541 doi:10.1093/nar/gkh340.
- 1542 [82] Nguyen L-T, Schmidt HA, Haeseler von A, Minh BQ. IQ-TREE: a fast  
1543 and effective stochastic algorithm for estimating maximum-likelihood  
1544 phylogenies. *Mol Biol Evol* 2015;32:268–74.  
1545 doi:10.1093/molbev/msu300.
- 1546 [83] Inouye S, Noguchi M, Sakaki Y, Takagi Y, Miyata T, Iwanaga S, et al.  
1547 Cloning and sequence analysis of cDNA for the luminescent protein



- 1548           aequorin. *Proc Natl Acad Sci USA* 1985;82:3154–8.  
1549           doi:10.1073/pnas.82.10.3154.
- 1550   [84]   Virtanen P, Gommers R, Oliphant TE, Haberland M, Reddy T,  
1551           Cournapeau D, et al. SciPy 1.0: fundamental algorithms for scientific  
1552           computing in Python. *Nat Methods* 2020;17:261–72.  
1553           doi:10.1038/s41592-019-0686-2.
- 1554   [85]   McKinney W. Data Structures for Statistical Computing in Python.  
1555           SciPy, SciPy; 2010, pp. 56–61. doi:10.25080/Majora-92bf1922-00a.
- 1556   [86]   Harris CR, Millman KJ, van der Walt SJ, Gommers R, Virtanen P,  
1557           Cournapeau D, et al. Array programming with NumPy. *Nature*  
1558           2020;585:357–62. doi:10.1038/s41586-020-2649-2.
- 1559   [87]   Doyle EL, Booher NJ, Standage DS, Voytas DF, Brendel VP, VanDyk  
1560           JK, et al. TAL Effector-Nucleotide Targeter (TALE-NT) 2.0: tools for  
1561           TAL effector design and target prediction. *Nucleic Acids Res*  
1562           2012;40:W117–22. doi:10.1093/nar/gks608.
- 1563   [88]   Cermak T, Doyle EL, Christian M, Wang L, Zhang Y, Schmidt C, et al.  
1564           Efficient design and assembly of custom TALEN and other TAL  
1565           effector-based constructs for DNA targeting. *Nucleic Acids Res*  
1566           2011;39:e82–2. doi:10.1093/nar/gkr218.
- 1567   [89]   Dahlem TJ, Hoshijima K, Juryneć MJ, Gunther D, Starker CG, Locke  
1568           AS, et al. Simple methods for generating and detecting locus-specific  
1569           mutations induced with TALENs in the zebrafish genome. *PLoS Genet*  
1570           2012;8:e1002861. doi:10.1371/journal.pgen.1002861.
